# Supplementary material for: Exercise and Interorgan Communication: Short-Term Exercise Training Blunts Differences in Consecutive Daily Urine 1H-NMR Metabolomic Signatures between Physically Active and Inactive Individuals
Source: MDPI journal article supplement (doi:10.3390/metabo12060473), 2022-05-24
Supplement: s1 [file s1]

# Example $^1\text{H}$ -NMR spectra characteristic of the trained- and untrained groups

- Representative spectra from untrained and trained participant of the X-Adapt study before (pre) and after (post) performed exercise
- Water region was excluded

Chemical shift range: 1.0 to 2.0 ppm

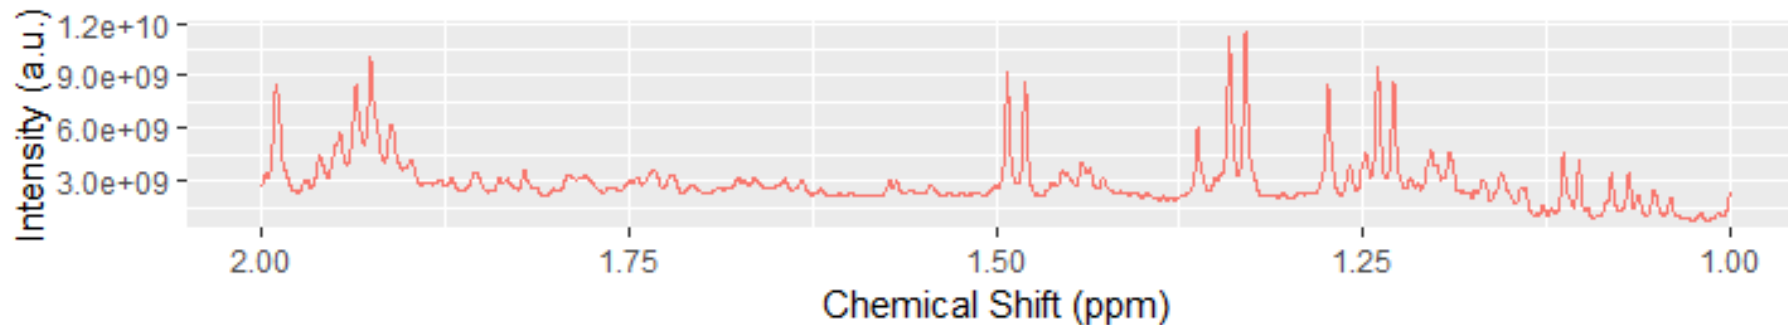

Untrained - preexercise

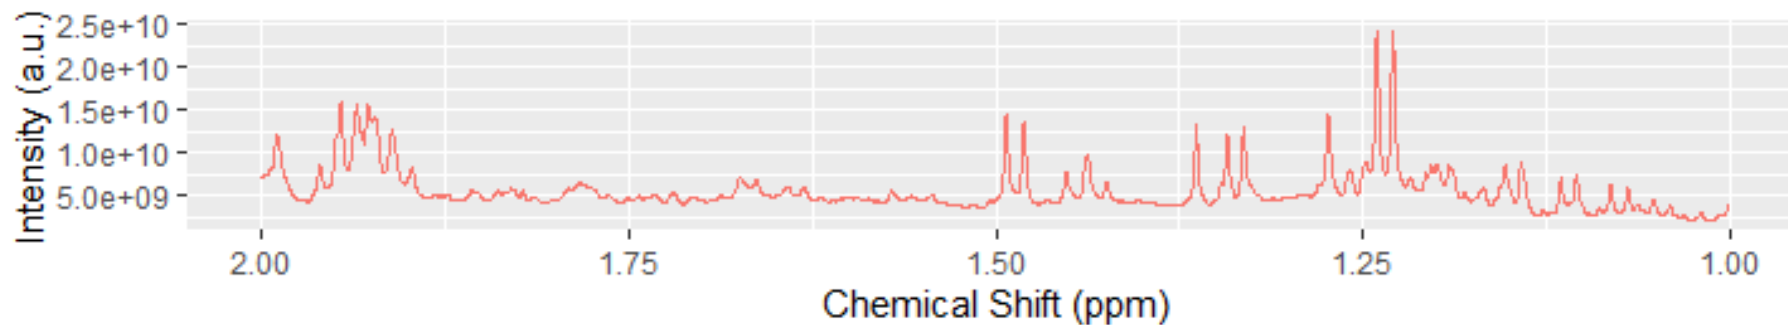

Untrained - postexercise

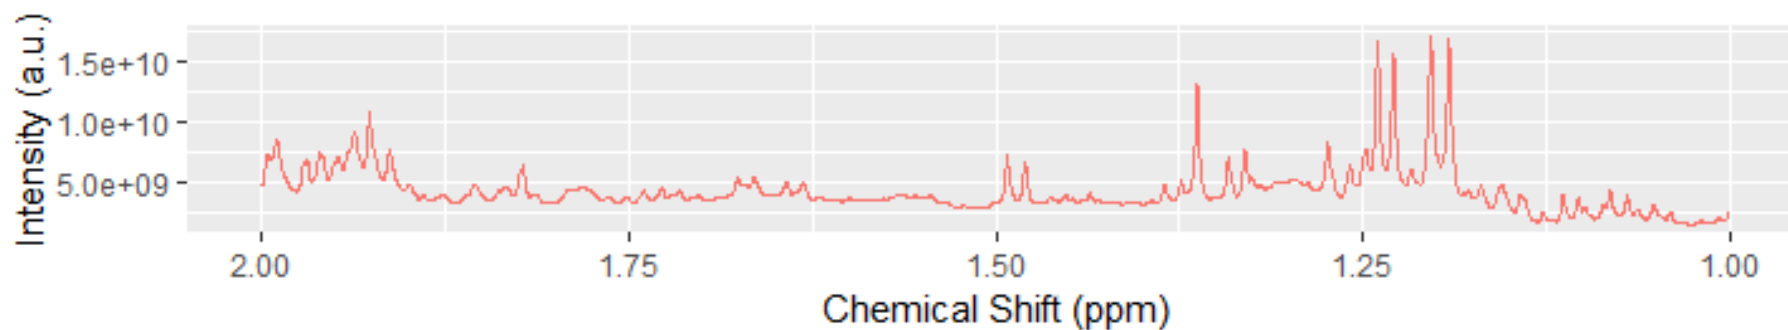

Trained - preexercise

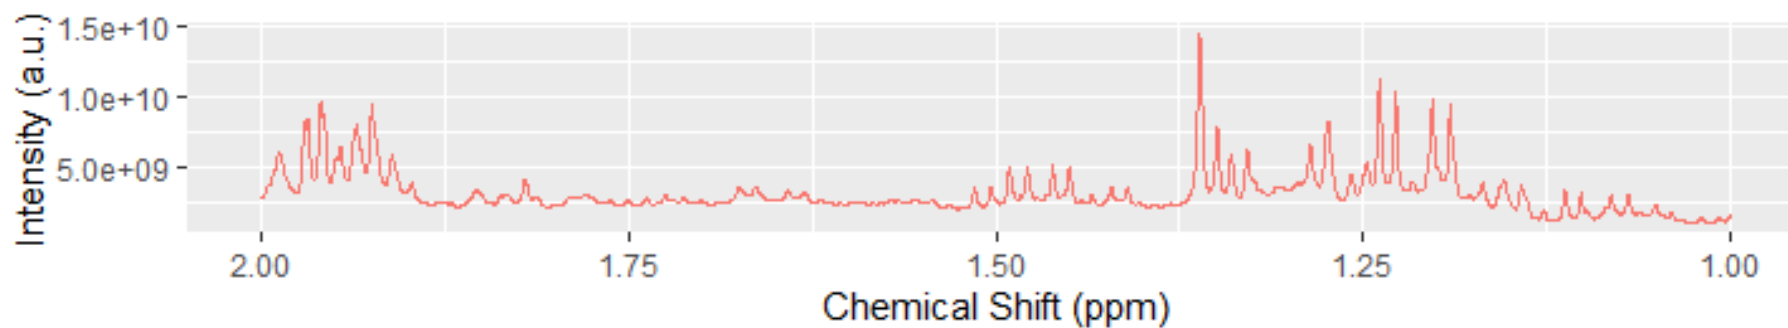

Trained - postexercise

# Chemical shift range: 2.0 to 3.0 ppm

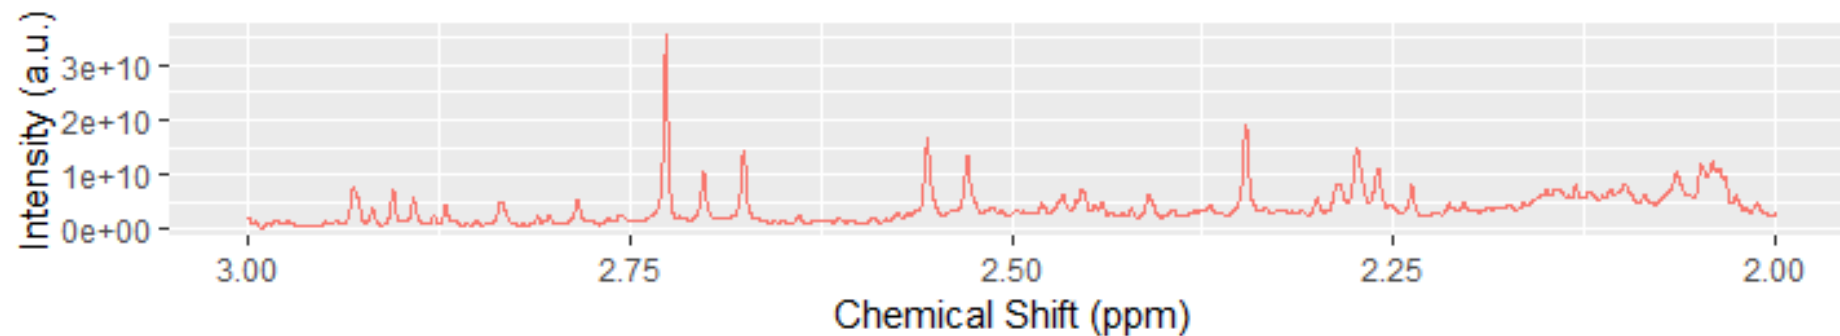

Untrained - preexercise

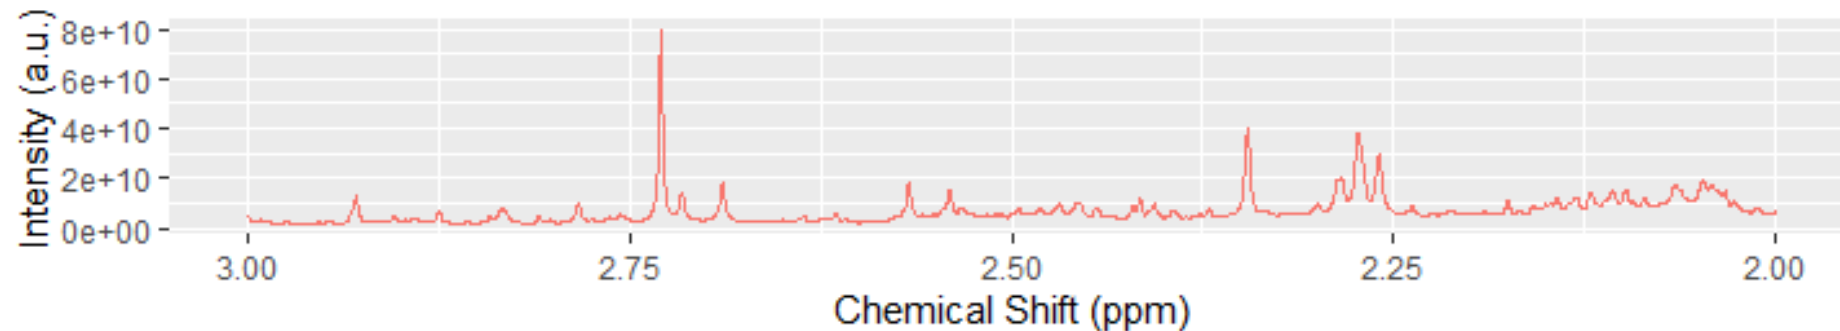

Untrained - postexercise

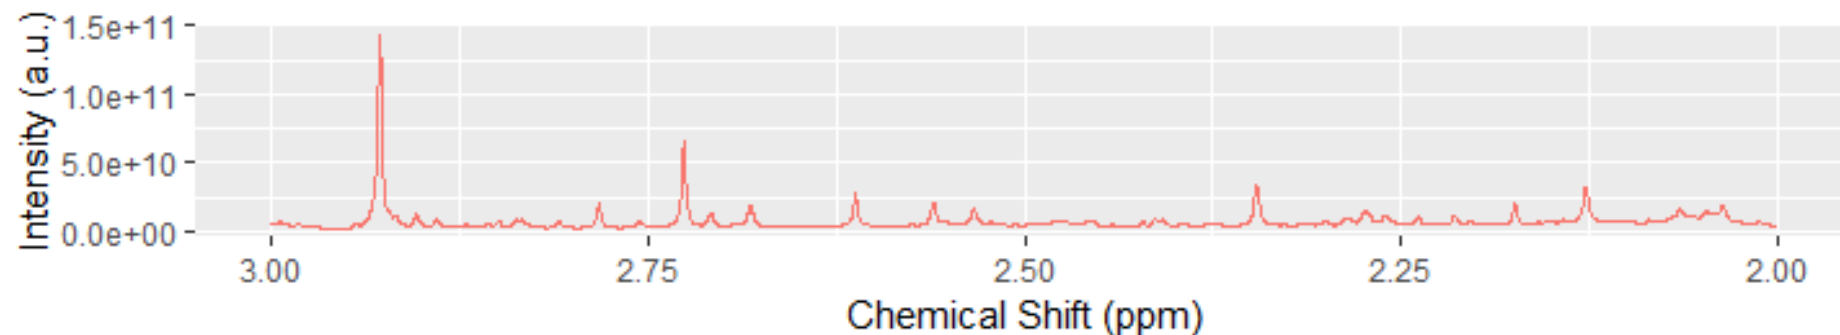

Trained - preexercise

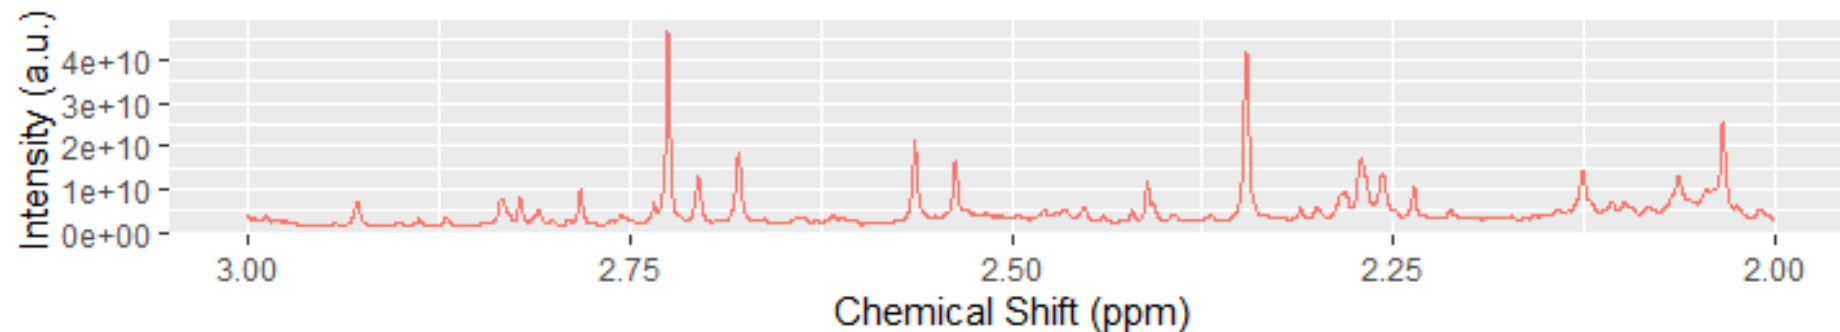

Trained - postexercise

# Chemical shift range: 3.0 to 4.0 ppm

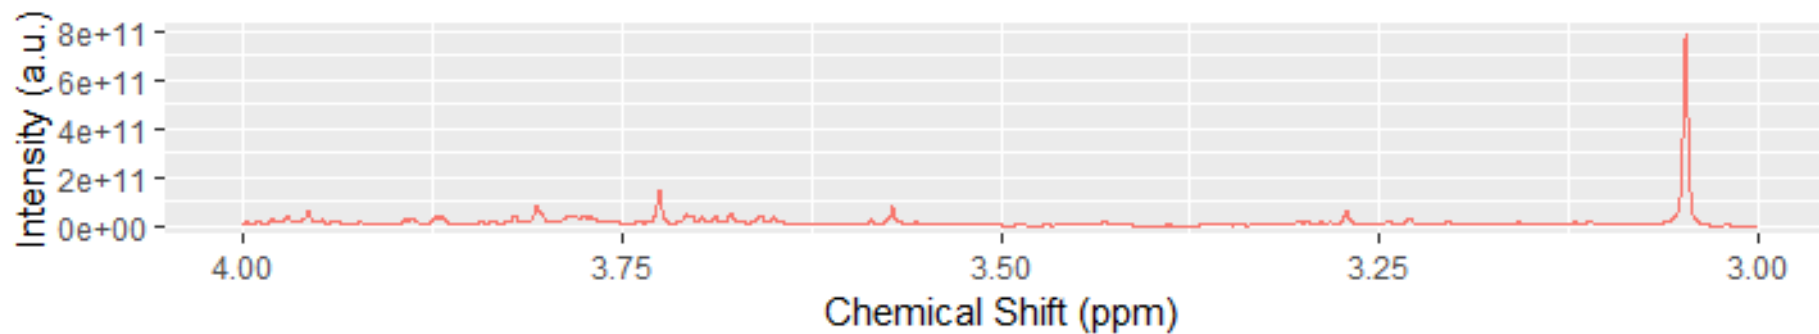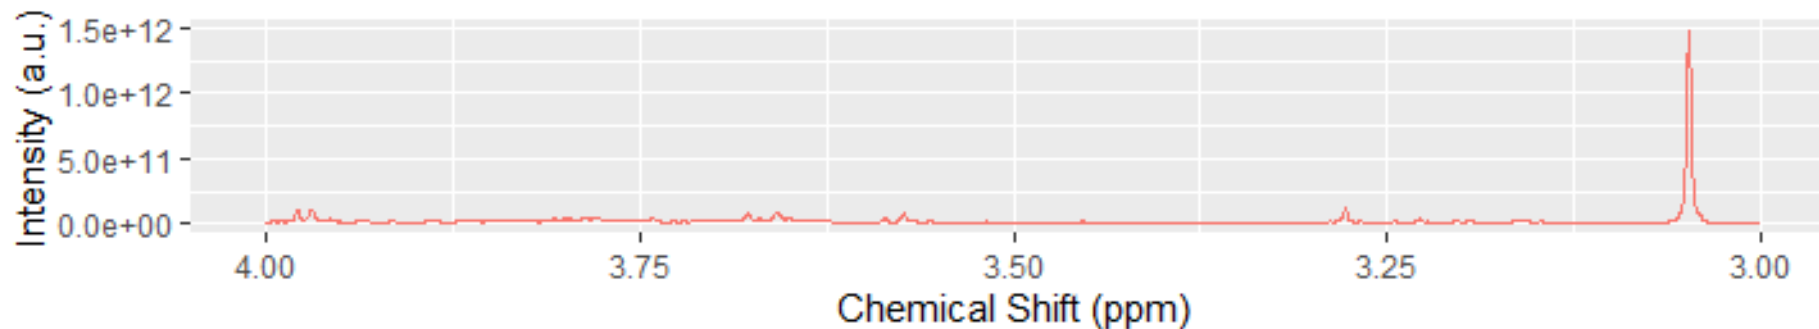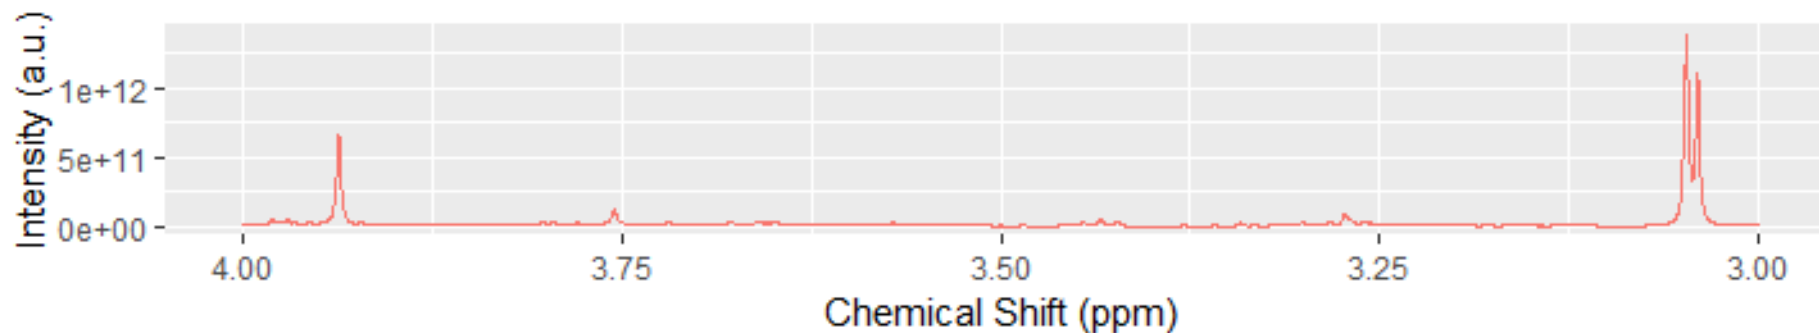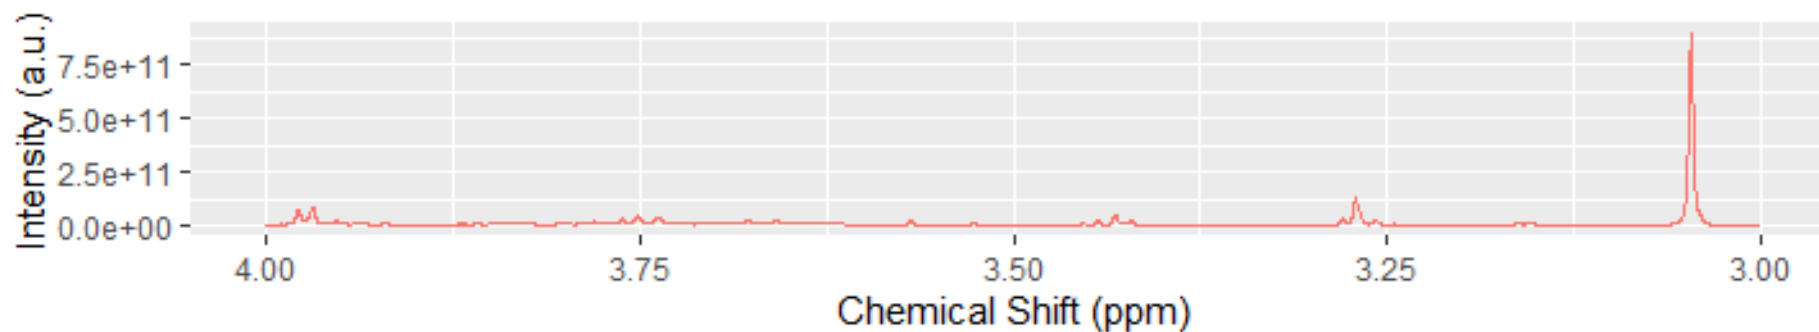

# Chemical shift range: 4.0 to 4.5 ppm

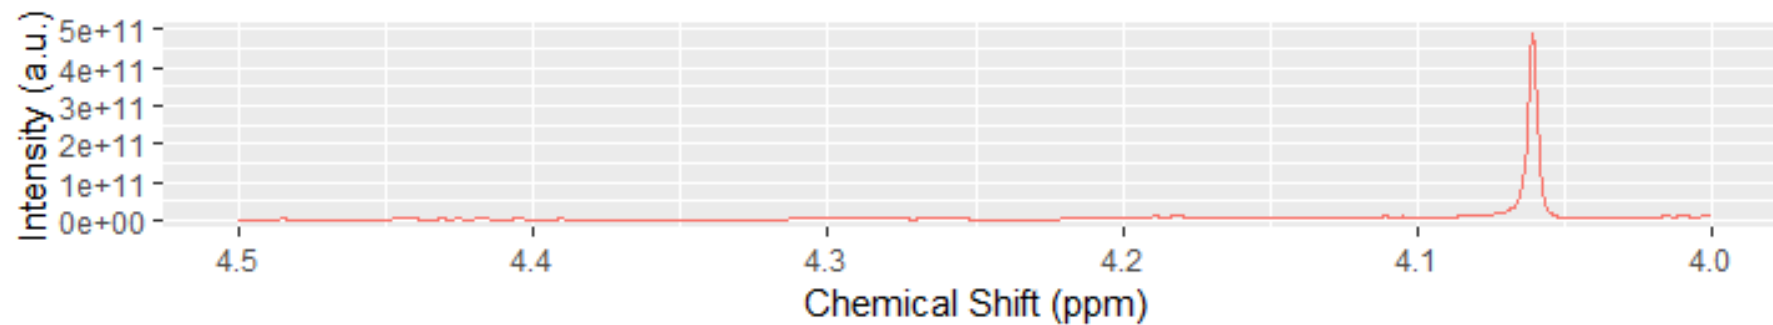

Untrained - preexercise

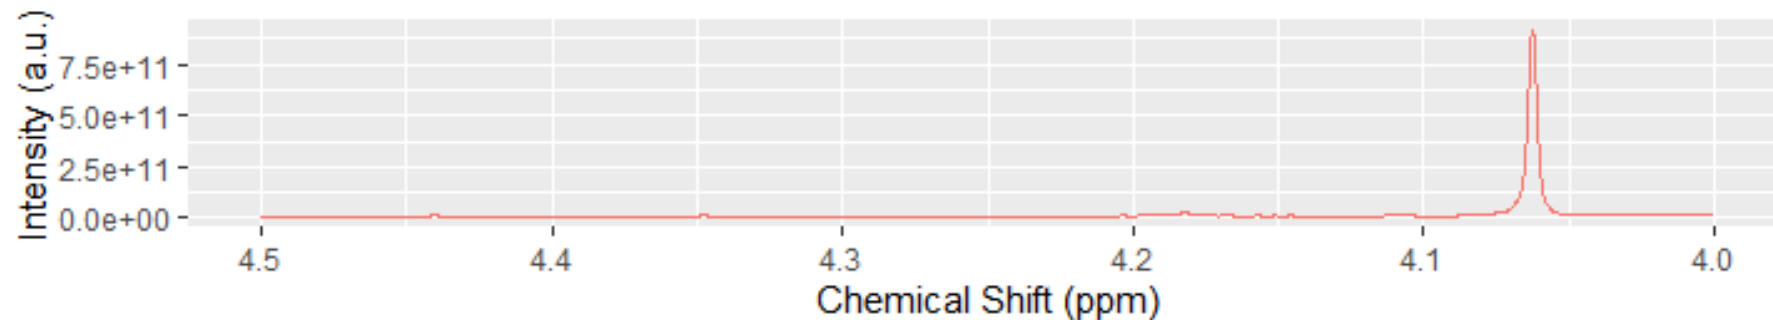

Untrained - postexercise

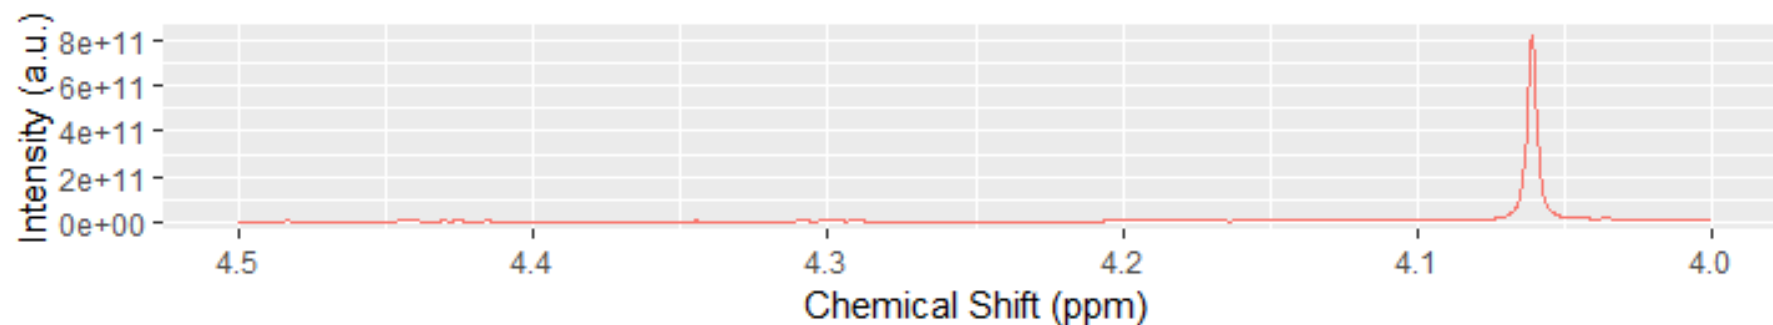

Trained - preexercise

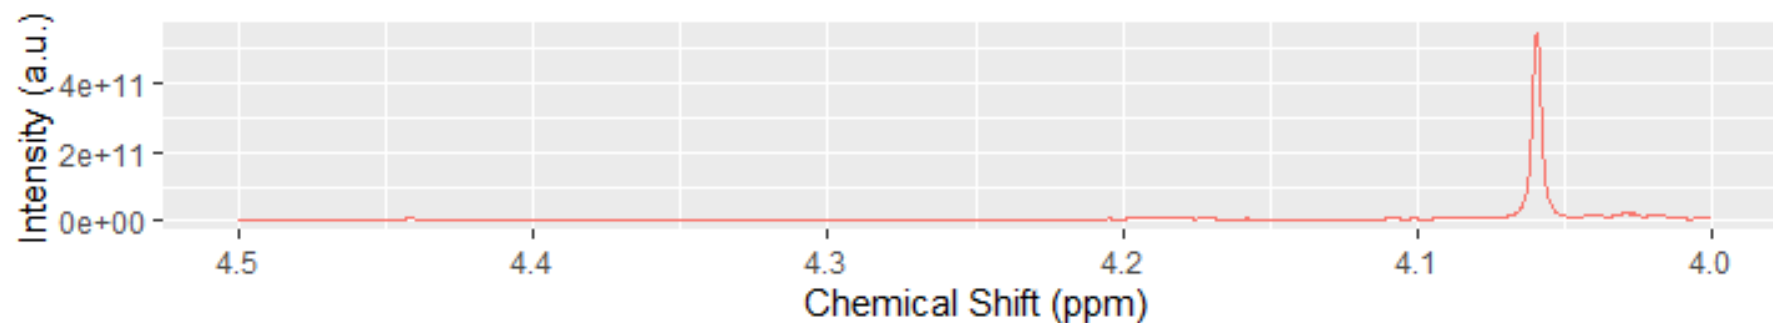

Trained - postexercise

# Chemical shift range: 5.1 to 6.0 ppm

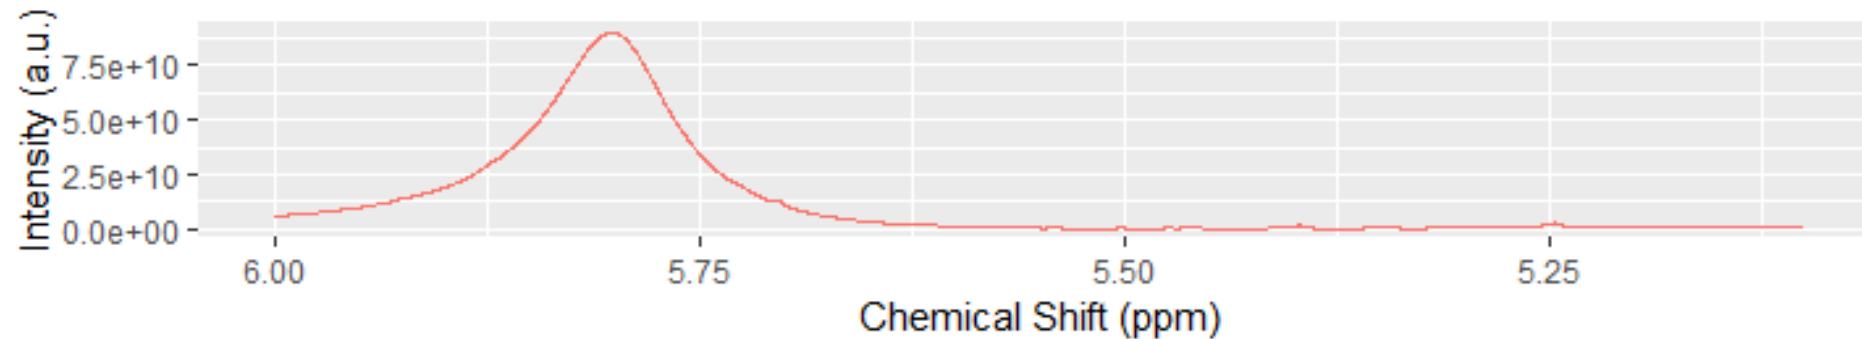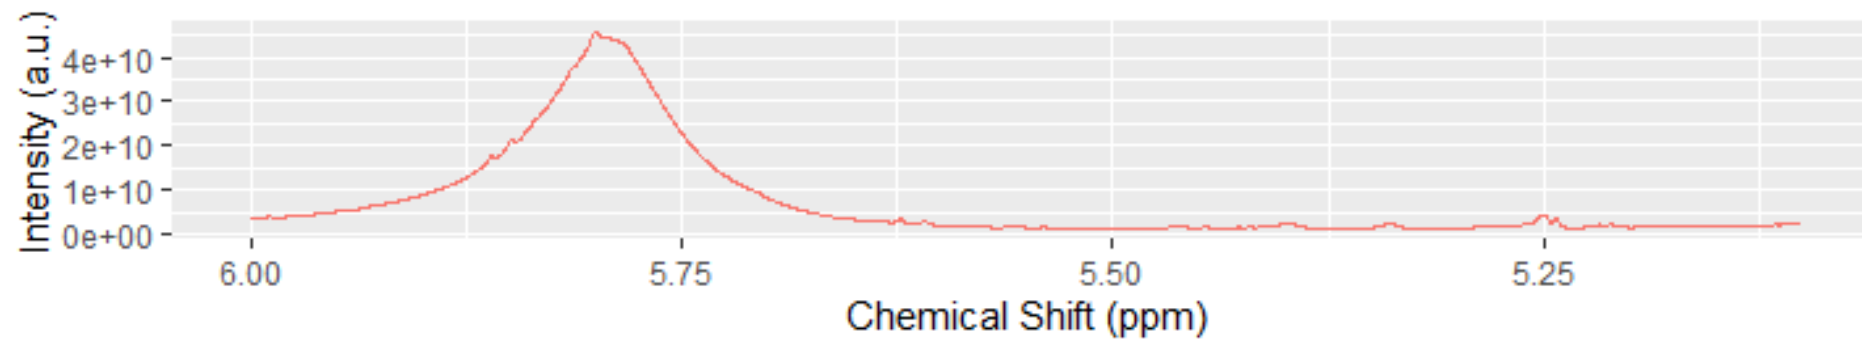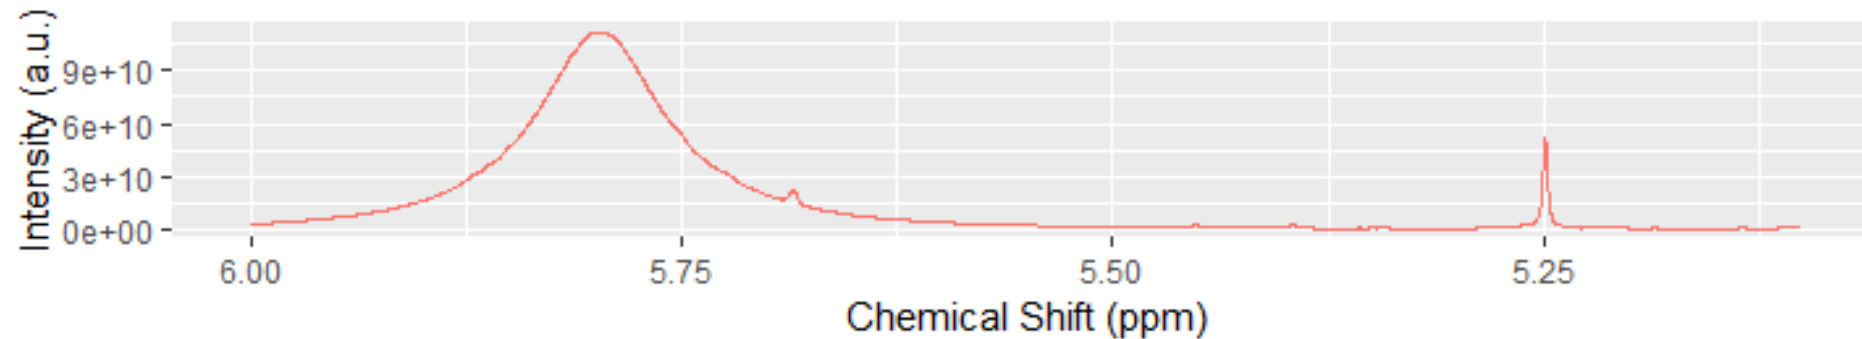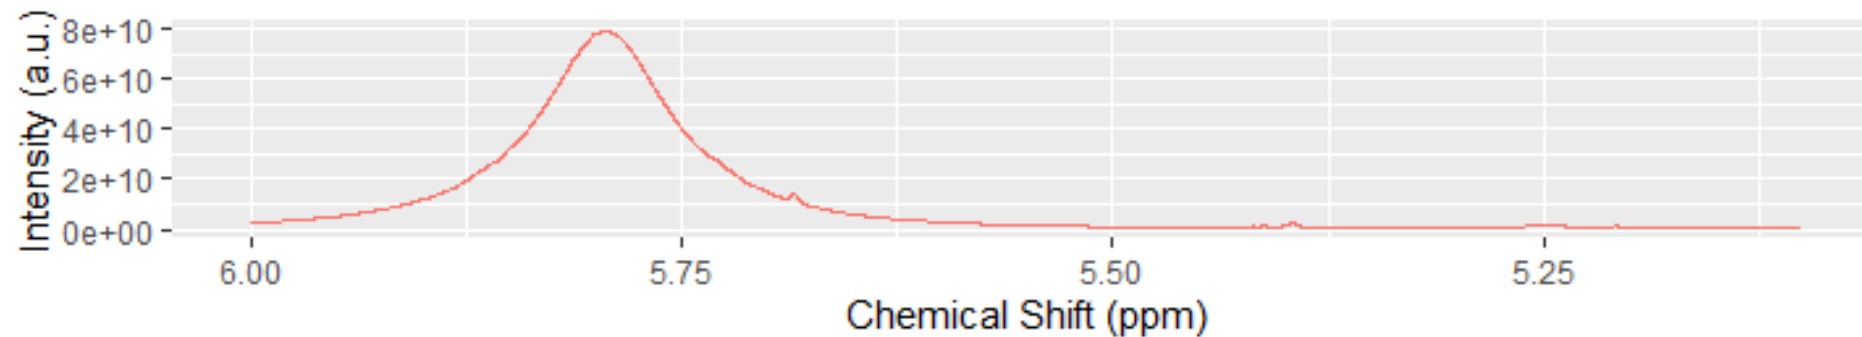

# Chemical shift range: 6.0 to 7.0 ppm

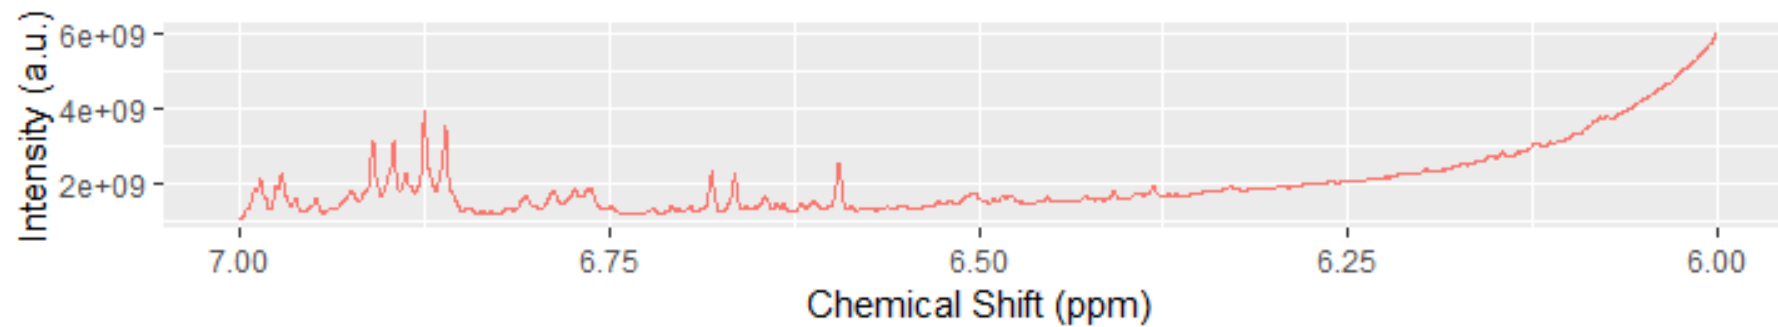

Untrained - preexercise

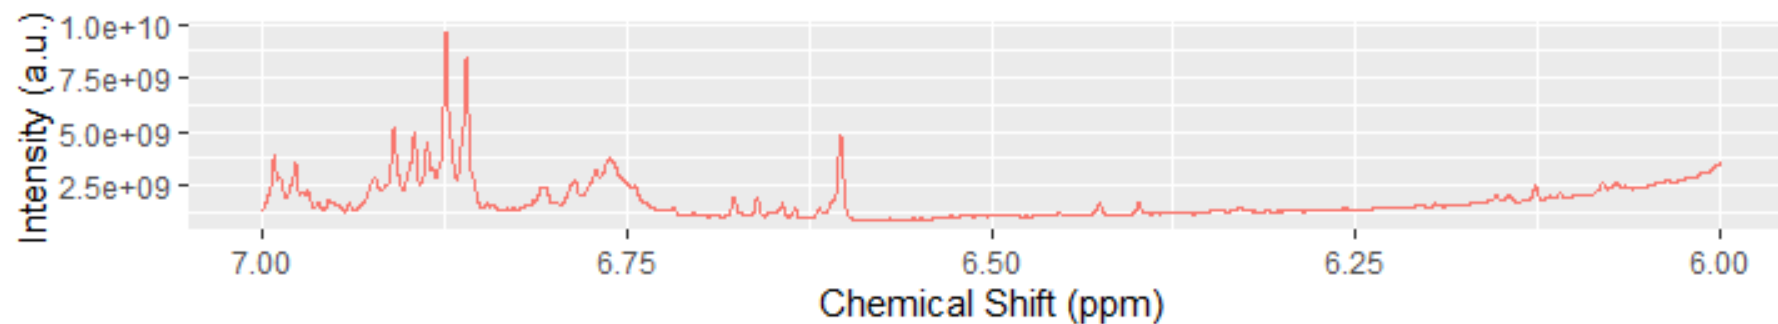

Untrained - postexercise

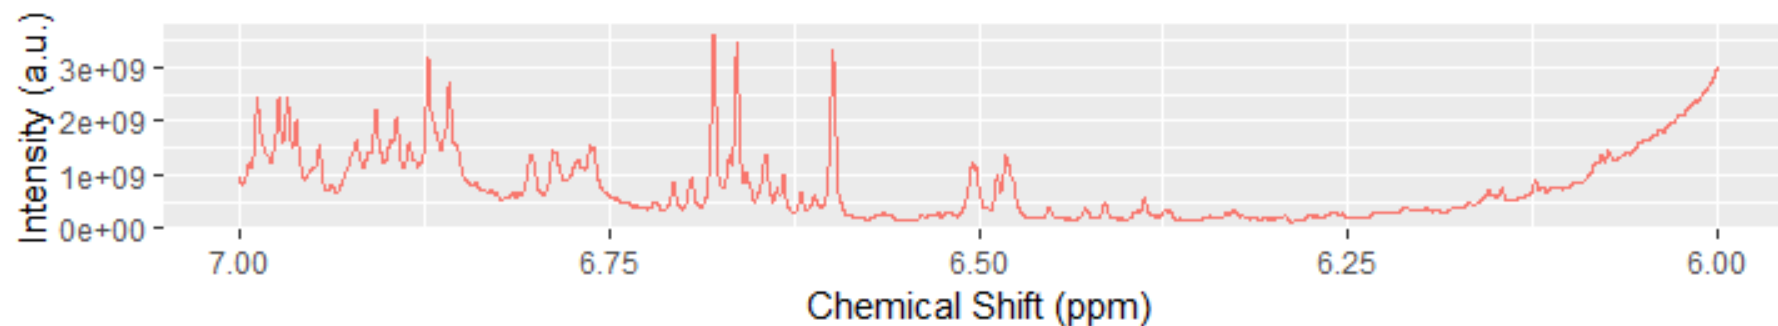

Trained - preexercise

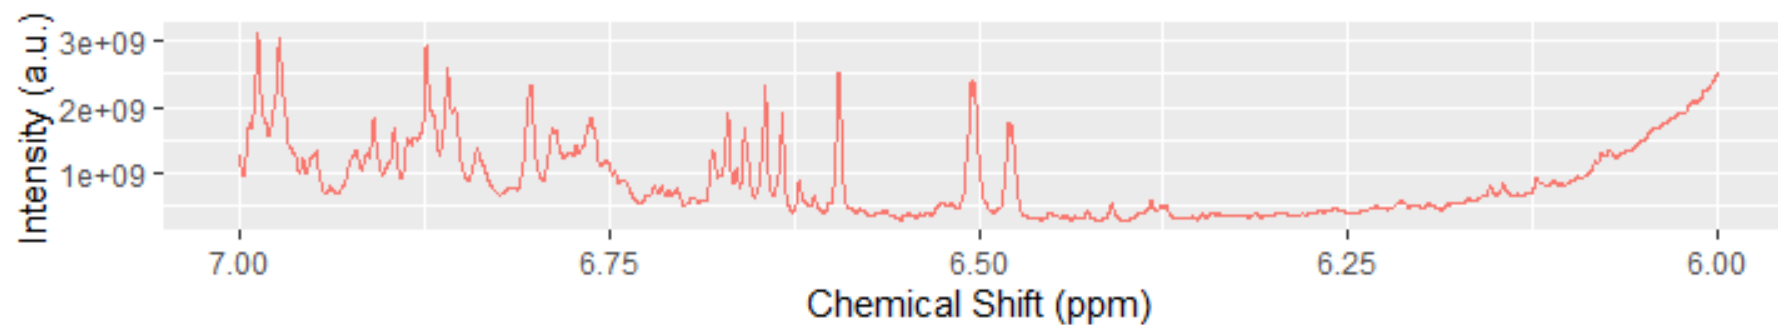

Trained - postexercise

Chemical shift range: 7.0 to 8.0 ppm

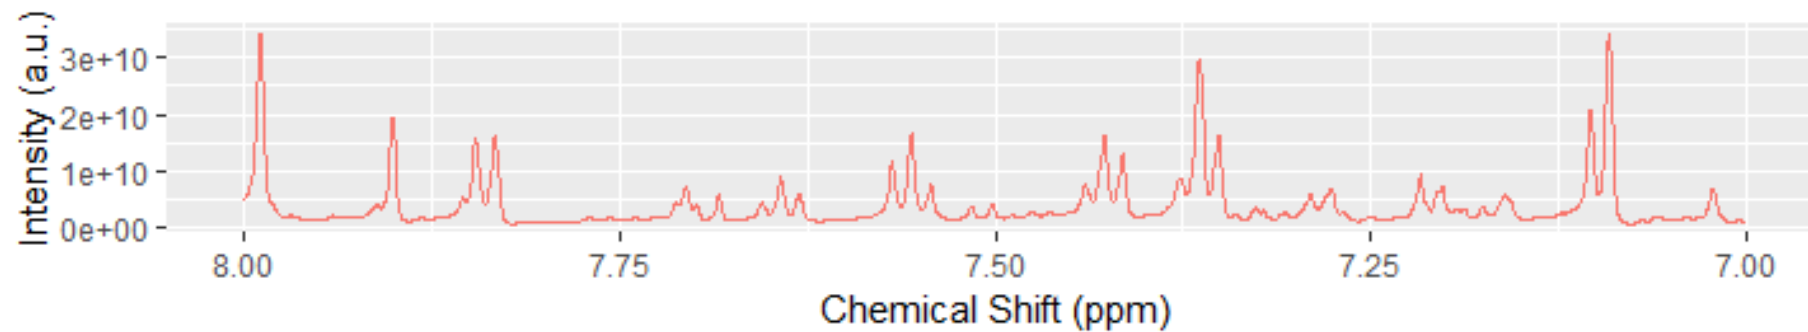

Untrained - preexercise

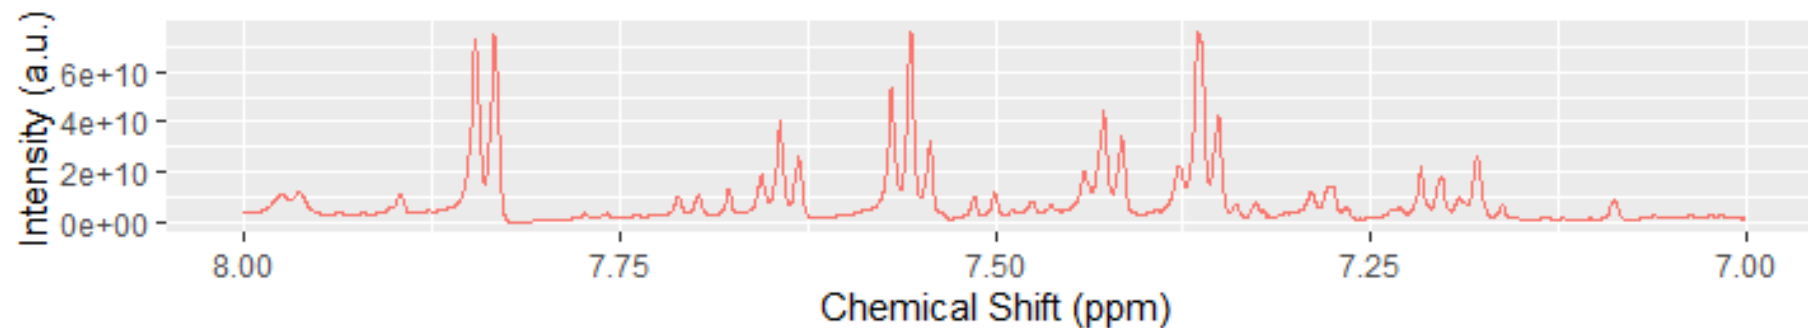

Untrained - postexercise

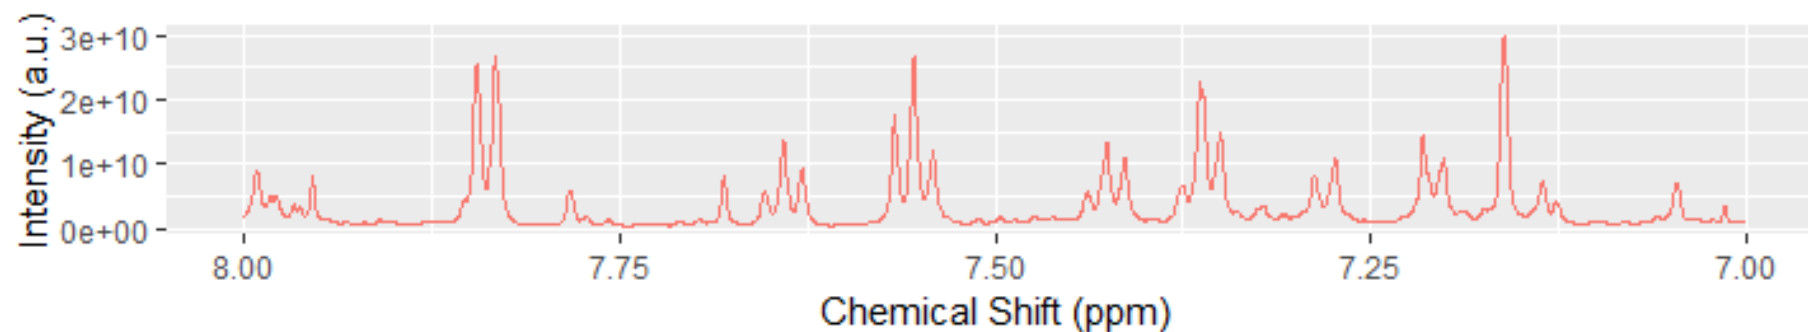

Trained - preexercise

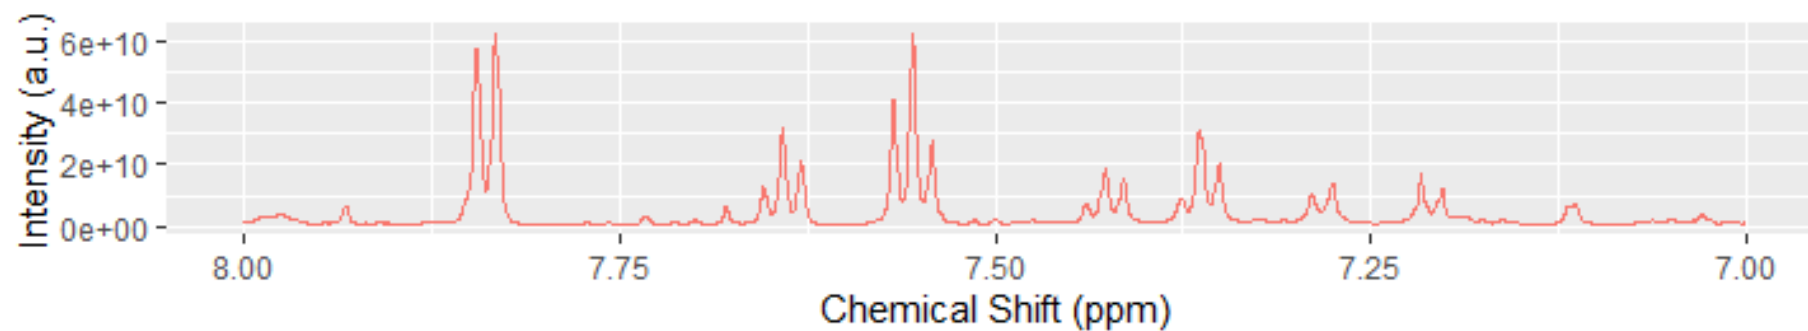

Trained - postexercise



Chemical shift range: 8.0 to 9.0 ppm

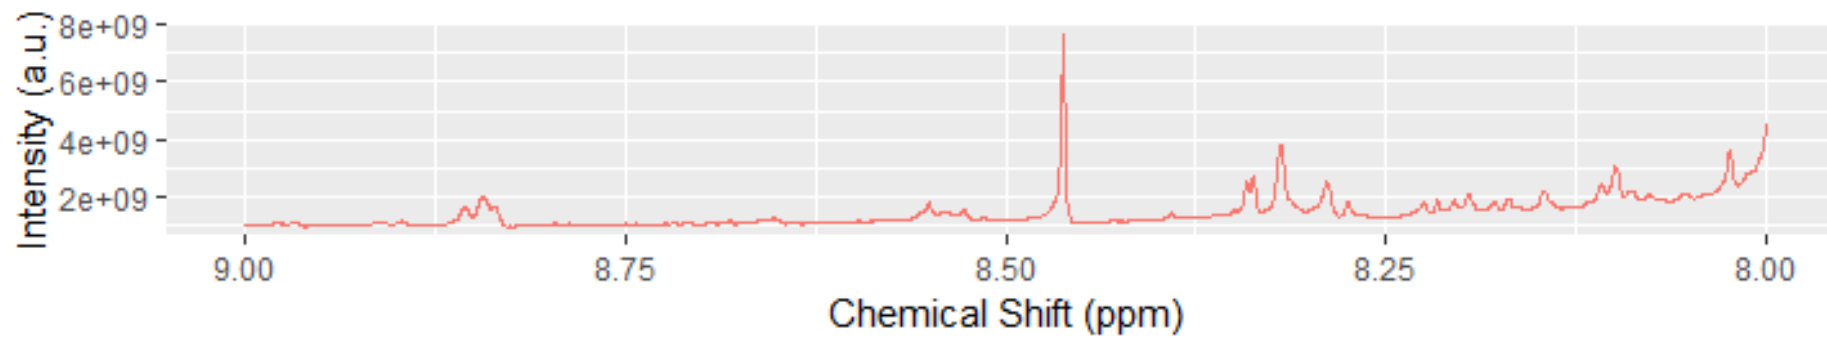

Untrained - preexercise

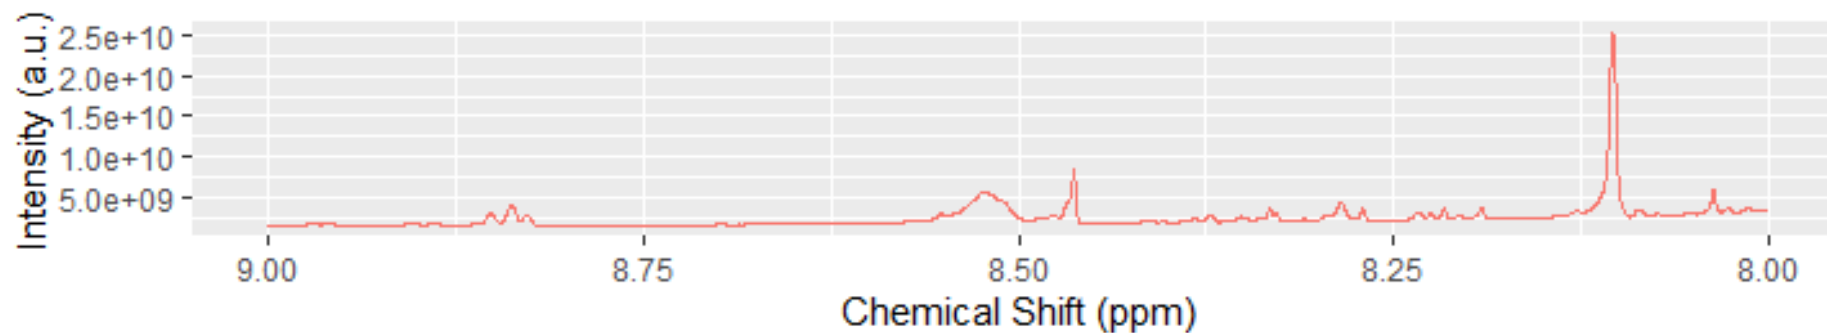

Untrained - postexercise

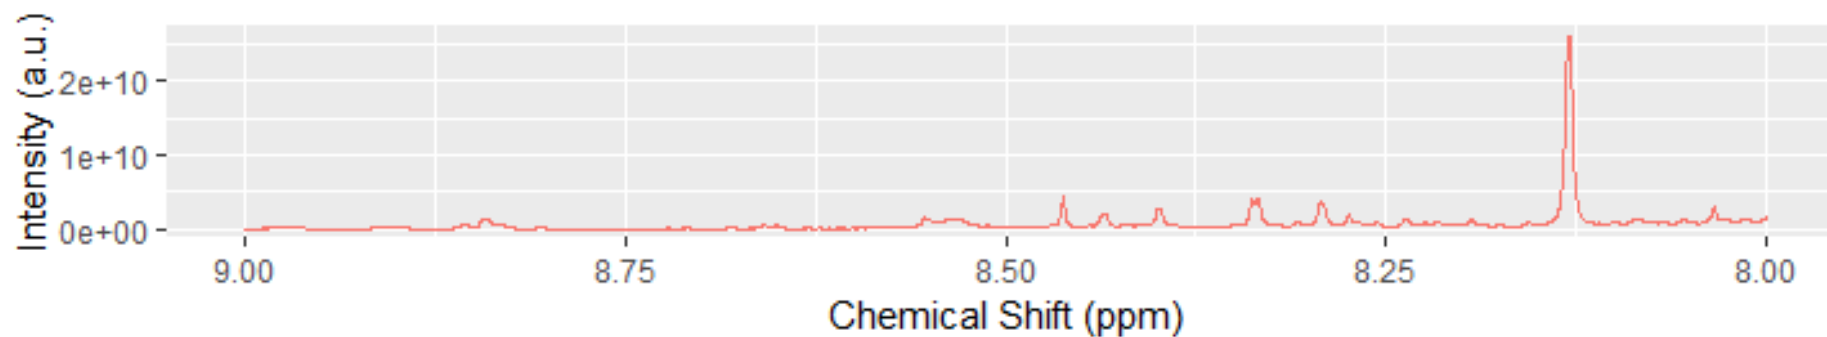

Trained - preexercise

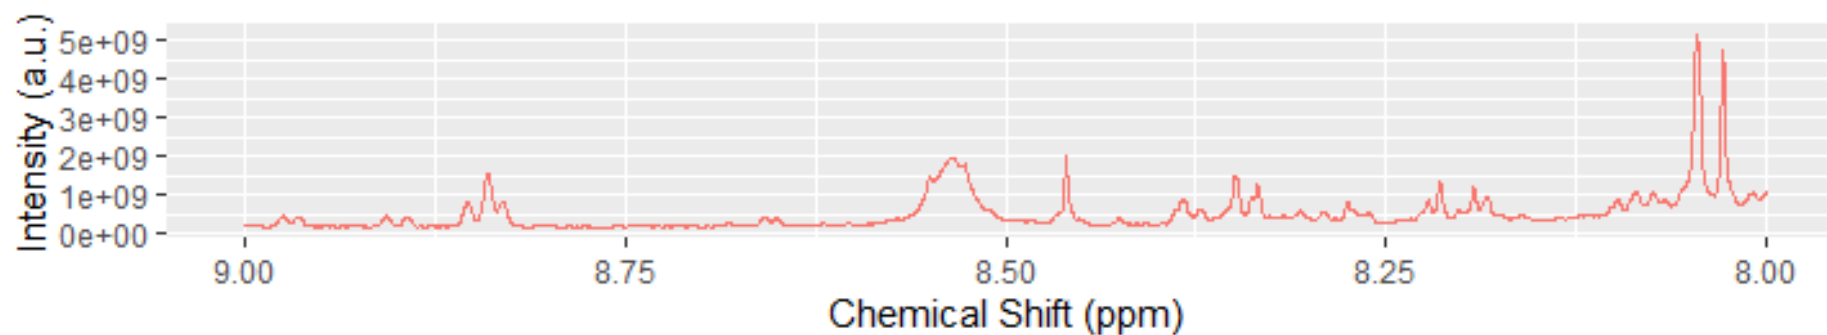

Trained - postexercise

# Chemical shift range: 3.2 to 3.6 ppm

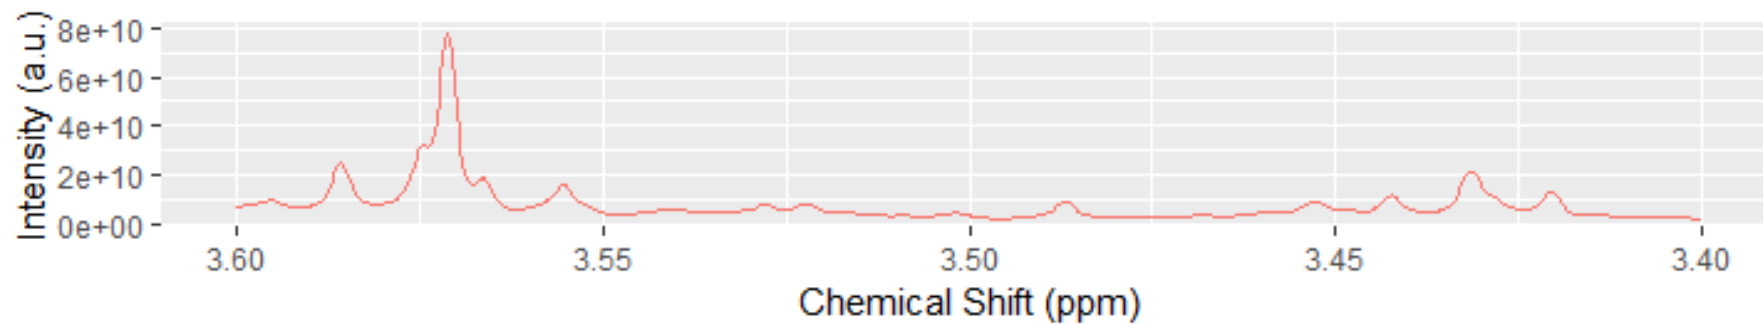

Untrained - preexercise

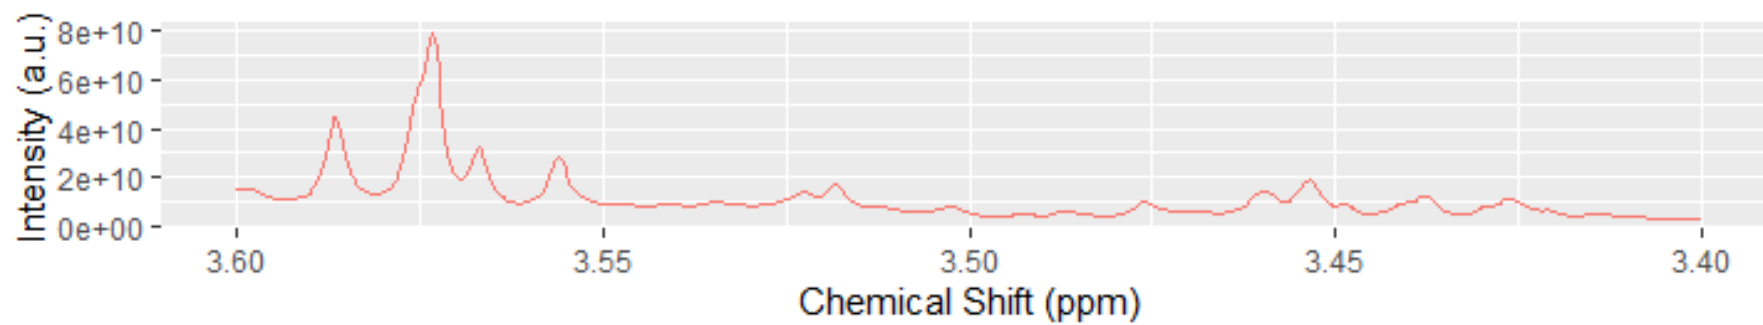

Untrained - postexercise

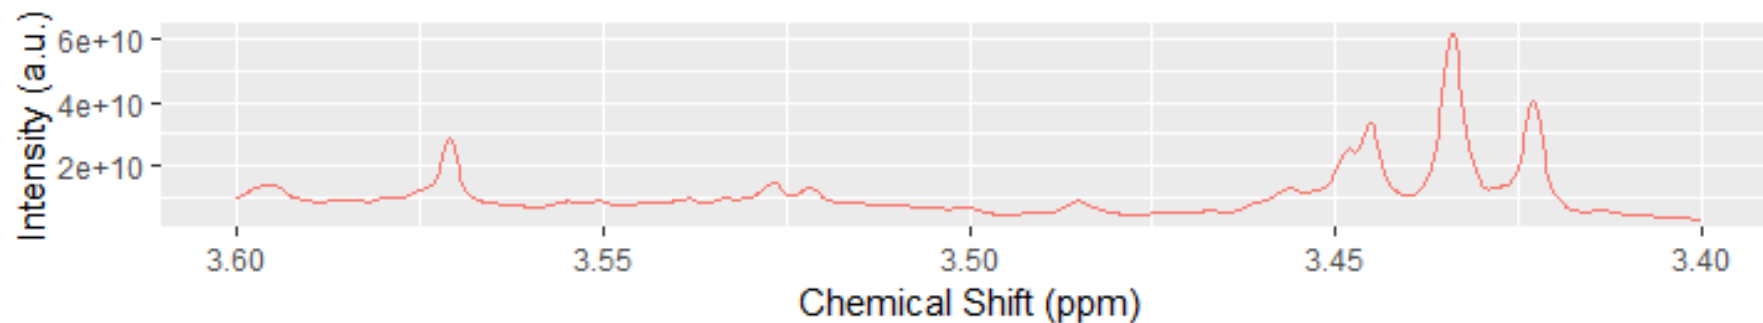

Trained - preexercise

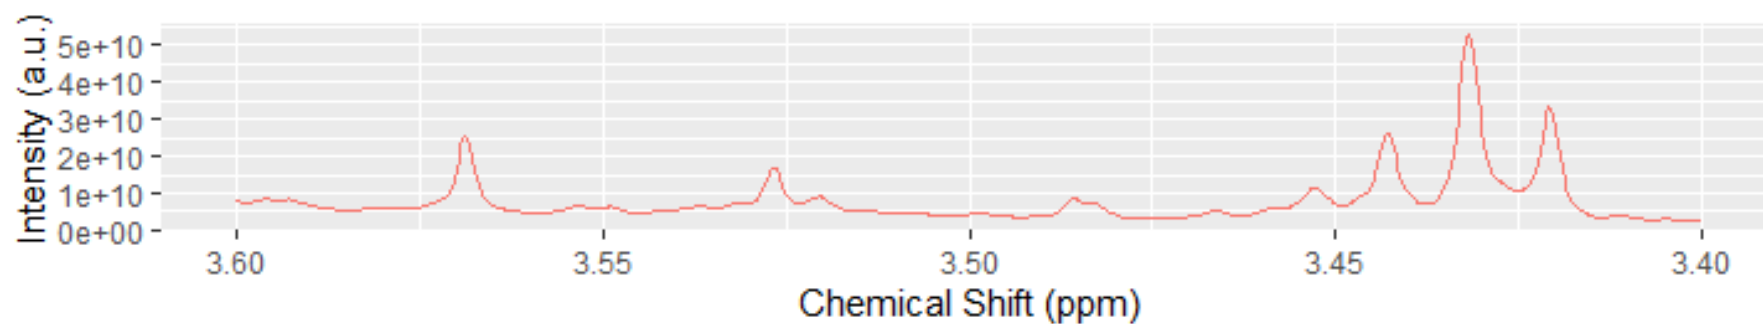

Trained - postexercise

# Chemical shift range: 2.4 to 5.0 ppm

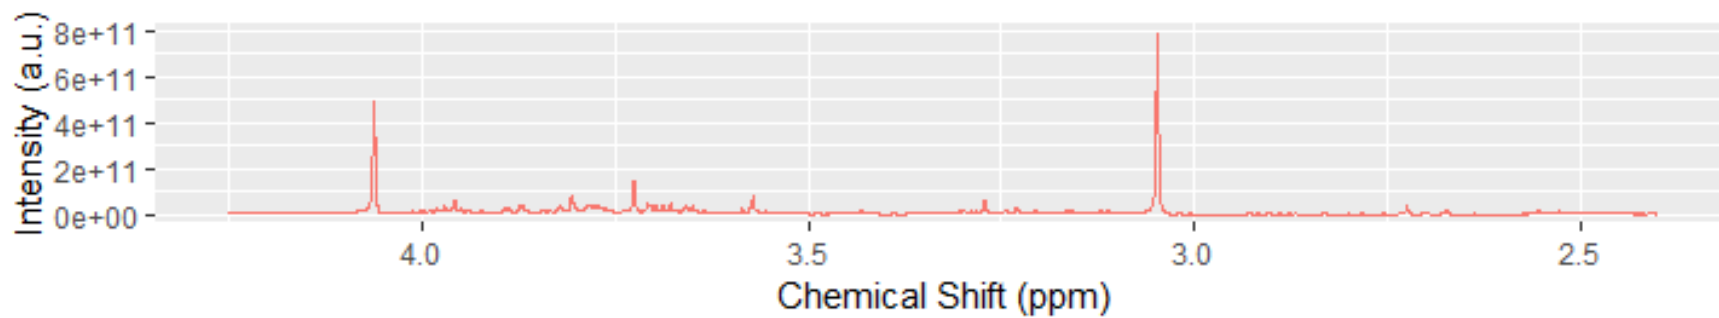

Untrained - preexercise

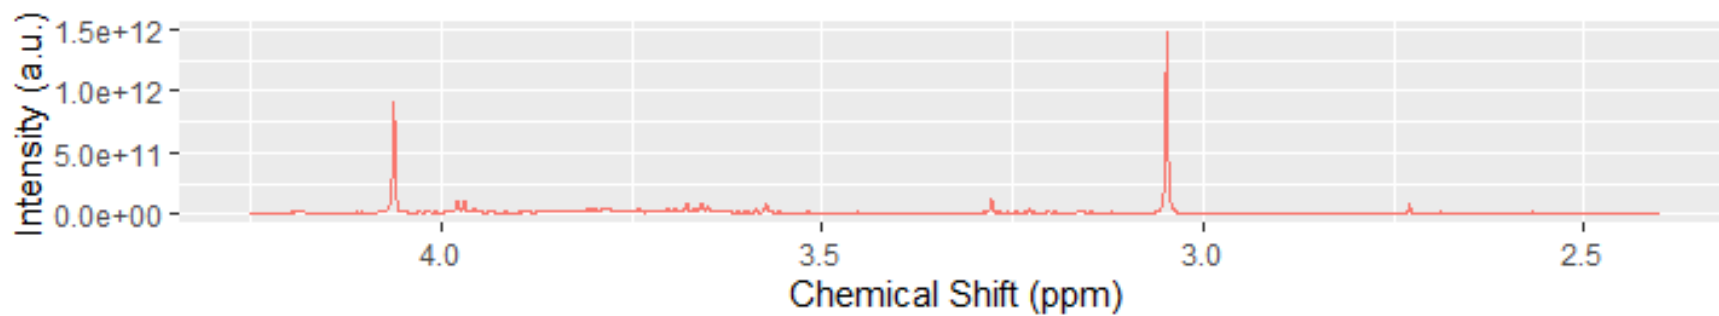

Untrained - postexercise

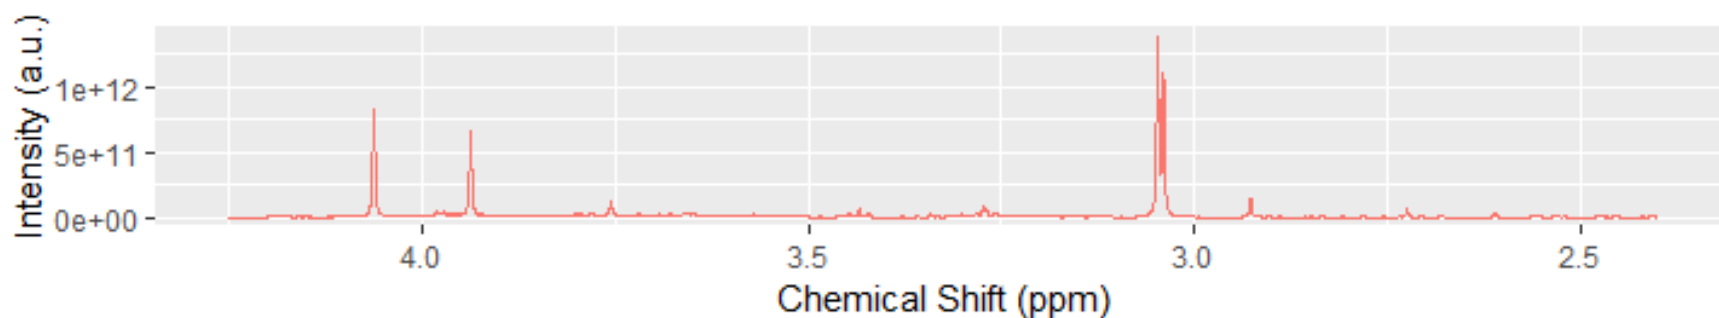

Trained - preexercise

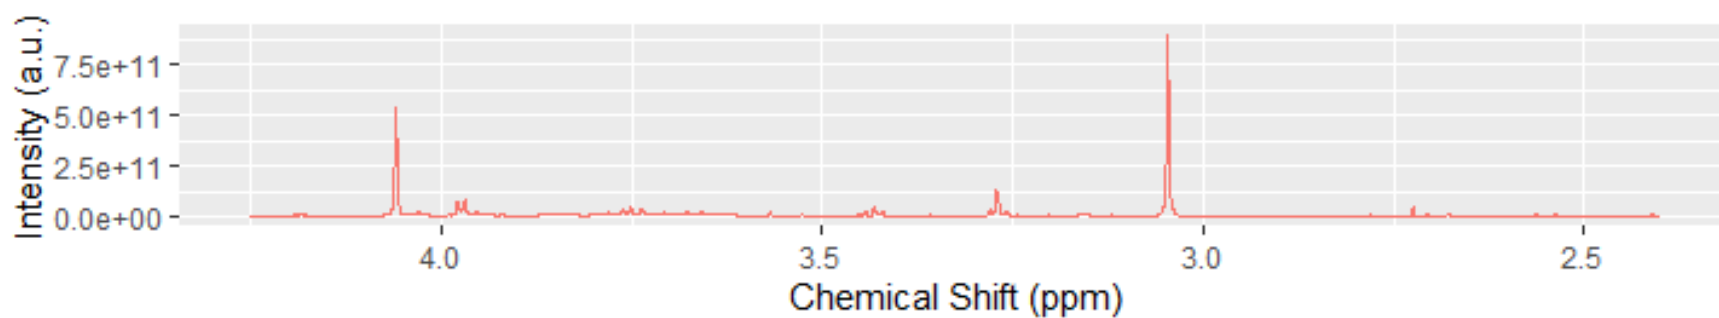

Trained - postexercise
