# Supplementary material for: Exercise and Interorgan Communication: Short-Term Exercise Training Blunts Differences in Consecutive Daily Urine 1H-NMR Metabolomic Signatures between Physically Active and Inactive Individuals
Source: Metabolites. 2022 May 24;12(6):473. doi: 10.3390/metabo12060473 (PMC9229485; doi:10.3390/metabo12060473)
Supplement: Supplementary file 1 [file metabolites-12-00473-s001.zip]

Archive with 4 entries (4 files):
- File S1.pdf
- File S2.zip
- File S3.pdf
- File S4.txt
