# Supplementary material for: Exercise and Interorgan Communication: Short-Term Exercise Training Blunts Differences in Consecutive Daily Urine 1H-NMR Metabolomic Signatures between Physically Active and Inactive Individuals
Source: Metabolites. 2022 May 24;12(6):473. doi: 10.3390/metabo12060473 (PMC9229485; doi:10.3390/metabo12060473)
Supplement: Supplementary file 1 [file metabolites-12-00473-s001.zip › File S4.txt]

Sample	Activity	Salinity (%)	pH	Conductivity (mS)	TDS (ppt)	1,3-Diaminopropane	1,3-Dihydroxyacetone	1,3-Dimethylurate	1,6-Anhydro-beta-D-glucose	1,7-Dimethylxanthine	1-Methylnicotinamide	2'-Deoxyadenosine	2'-Deoxyguanosine	2'-Deoxyinosine	2'-Deoxyuridine	2,3,4-Trihydroxybenzoate	2,6-Dihydroxybenzoate	2-Aminoadipate	2-Aminobutyrate	2-Ethylacrylate	2-Furoate	2-Furoylglycine	2-Hydroxy-3-methylvalerate	2-Hydroxybutyrate	2-Hydroxyglutarate	2-Hydroxyisobutyrate	2-Hydroxyisocaproate	2-Hydroxyisovalerate	2-Hydroxyphenylacetate	2-Hydroxyvalerate	2-Methylglutarate	2-Octenoate	2-Oxobutyrate	2-Oxocaproate	2-Oxoglutarate	2-Oxoisocaproate	2-Oxovalerate	2-Phenylpropionate	2-Phosphoglycerate	3,4-Dihydroxybenzeneacetate	3,4-Dihydroxymandelate	3,5-Dibromotyrosine	3-Aminoisobutyrate	3-Chlorotyrosine	3-Hydromuconate	3-Hydroxy-3-methylglutarate	3-Hydroxybutyrate	3-Hydroxyisobutyrate	3-Hydroxyisovalerate
xadapt_001	trained	0.51	3.31	10.74	7.64	37.30	0.90	13.80	12.50	13.90	10.40	8.10	0.00	0.00	0.00	0.00	0.00	30.30	0.00	0.00	0.00	1.00	0.00	0.00	0.00	7.60	0.00	0.00	11.10	0.00	2.30	0.00	0.00	0.00	0.00	0.00	0.00	3.10	0.00	4.40	2.20	5.60	0.00	22.40	0.00	5.30	8.30	0.00	20.10
xadapt_002	trained	0.51	3.83	10.3	7.31	0.00	3.30	3.60	0.00	5.20	3.90	0.00	0.00	0.00	0.00	0.00	0.00	51.70	0.00	0.00	0.00	4.40	0.00	0.00	0.00	6.10	0.00	0.00	7.70	0.00	0.00	0.00	0.00	0.00	0.00	0.00	0.00	0.00	0.00	1.40	19.00	22.20	0.00	7.20	0.00	1.70	5.70	0.00	14.20
xadapt_003	trained	0.31	5.52	6.44	4.58	0.00	0.70	3.30	11.40	3.50	2.60	0.00	0.00	0.60	0.00	0.00	0.00	26.50	0.00	0.00	0.00	5.30	0.00	0.00	0.00	4.10	0.00	0.00	2.00	0.00	0.00	0.00	0.00	0.00	0.00	0.00	0.00	0.00	0.00	1.20	3.20	2.80	0.00	6.70	2.00	2.00	3.60	0.00	9.30
xadapt_004	trained	0.32	3.6	6.37	4.53	0.00	0.50	2.60	9.10	1.90	3.60	0.00	0.00	0.00	0.00	0.00	0.00	38.20	0.00	3.40	0.00	4.20	0.00	0.00	79.80	4.30	0.00	0.00	7.50	0.00	4.70	0.00	0.00	0.00	0.00	0.00	0.00	0.00	0.00	9.50	2.00	1.70	0.00	12.40	0.00	5.60	4.50	0.00	5.60
xadapt_005	trained	0.42	4.87	8.4	5.97	0.00	0.30	5.00	28.40	4.70	5.50	0.00	0.00	0.00	0.00	0.00	0.00	52.10	0.00	0.00	2.10	11.20	0.00	0.00	0.00	7.90	0.00	0.00	11.80	0.00	1.00	0.00	0.00	0.00	0.00	0.00	0.00	0.00	0.00	6.90	3.50	5.30	0.00	26.00	0.00	4.80	0.00	0.00	14.00
xadapt_006	trained	0.37	3.78	7.57	5.39	0.00	1.20	0.00	0.00	6.60	3.90	0.00	0.00	0.00	0.00	0.00	0.00	43.80	0.00	0.00	0.90	5.40	0.00	0.00	0.00	7.70	0.00	0.00	18.70	0.00	1.70	0.00	0.00	0.00	0.00	0.00	0.00	4.10	189.30	3.20	0.00	8.50	0.00	21.20	0.00	12.30	0.00	1.40	15.20
xadapt_007	trained	0.38	4.45	7.73	5.49	0.00	1.40	4.60	17.80	9.00	2.60	0.00	0.00	0.00	0.00	0.00	0.00	41.10	0.00	0.00	0.00	1.00	0.00	0.00	0.00	4.70	0.00	0.00	9.80	0.00	5.80	0.00	0.00	0.00	0.00	0.00	0.00	3.00	67.30	0.00	9.10	9.90	0.00	14.30	3.60	2.30	0.00	1.80	10.60
xadapt_008	trained	0.27	3.88	5.48	7.89	0.00	0.00	1.30	0.00	3.30	4.20	0.00	0.00	0.00	0.00	0.00	0.00	29.60	0.00	0.00	0.00	0.00	0.00	0.00	0.00	5.40	0.00	0.00	6.20	0.00	0.00	0.00	0.00	0.00	0.00	0.00	0.00	0.00	0.00	0.00	1.10	4.80	2.10	12.30	2.20	1.50	5.60	0.00	11.90
xadapt_009	trained	0.37	3.62	7.5	5.35	0.00	0.60	0.00	21.20	7.00	3.20	0.00	0.00	0.00	0.00	0.00	0.00	54.60	0.00	0.00	0.00	0.00	0.00	0.00	0.00	5.70	0.00	0.00	8.50	0.00	0.00	0.00	0.00	0.00	0.00	0.00	0.00	0.00	0.00	0.00	4.00	3.20	0.00	18.60	3.40	10.00	0.00	0.00	16.40
xadapt_011	trained	0.44	3.74	8.89	6.31	12.80	0.90	1.50	0.00	4.20	4.60	0.00	0.00	1.10	3.60	0.00	0.00	32.50	0.00	0.00	1.80	7.40	0.00	0.00	0.00	3.80	0.00	0.00	10.30	8.80	1.10	0.00	0.00	0.00	0.00	0.00	0.00	0.00	0.00	2.30	2.30	1.60	0.00	11.80	0.00	4.70	5.50	0.00	15.30
xadapt_012	trained	0.48	3.98	9.71	6.9	0.00	0.70	2.40	16.00	4.90	7.40	0.00	0.00	0.00	0.00	0.00	0.00	59.50	0.00	0.00	0.00	3.10	0.00	0.00	33.30	7.80	0.00	0.00	10.30	0.00	0.00	0.00	0.00	0.00	0.00	0.00	0.00	0.00	0.00	3.30	0.00	10.30	0.00	30.30	0.00	5.20	5.80	0.00	21.60
xadapt_013	trained	0.46	3.82	9.28	6.6	0.00	3.40	1.10	0.00	6.30	0.70	0.00	0.00	0.00	0.00	0.00	0.00	14.60	0.00	0.00	0.00	0.00	0.00	0.00	0.00	3.40	0.00	0.00	3.80	0.00	0.00	0.00	0.00	0.00	0.00	0.00	0.00	0.00	0.00	0.00	0.00	4.30	0.00	13.10	1.30	1.40	3.20	0.00	11.70
xadapt_014	trained	0.63	3.23	12.94	9.19	0.00	1.40	5.10	26.80	15.20	8.10	0.00	0.00	0.00	0.00	0.00	0.00	111.40	0.00	0.00	3.40	3.20	0.00	0.00	116.00	9.20	0.00	0.00	6.50	0.00	0.00	0.00	0.00	0.00	0.00	0.00	0.00	0.00	0.00	9.20	2.80	13.70	0.00	25.10	5.30	10.20	0.00	2.80	8.80
xadapt_015	trained	0.57	4.43	11.85	8.42	0.00	1.10	0.90	32.80	7.60	10.00	6.40	0.00	0.00	0.00	0.00	0.00	110.00	0.00	0.00	4.10	5.70	0.00	0.00	65.90	8.80	0.00	0.00	27.00	0.00	0.00	0.00	0.00	0.00	0.00	0.00	0.00	0.00	0.00	9.10	4.80	27.90	0.00	26.20	7.70	9.00	0.00	0.00	8.10
xadapt_016	trained	0.87	3.24	17.62	14.14	0.00	0.20	1.60	11.50	1.80	6.60	0.00	0.00	0.00	0.00	4.10	0.00	95.90	0.00	0.00	0.00	9.30	0.00	0.00	68.10	8.30	0.00	0.00	4.00	0.00	1.80	0.00	0.00	0.00	0.00	0.00	0.00	0.00	0.00	4.80	3.20	6.20	0.00	8.80	0.00	6.90	0.00	4.10	8.50
xadapt_017	trained	0.7	2.82	14.51	12.04	0.00	0.00	3.00	29.70	7.30	8.10	0.00	0.00	1.10	0.00	0.00	0.00	106.90	0.00	0.00	2.00	9.00	18.90	0.00	0.00	7.50	0.00	0.00	4.40	0.00	1.90	0.00	0.00	0.00	0.00	0.00	0.00	2.00	0.00	3.30	6.70	23.50	0.00	21.60	0.00	8.00	0.00	4.50	10.30
xadapt_018	trained	0.81	2.94	16.59	13.76	0.00	0.00	7.10	25.30	6.30	7.00	0.00	0.00	0.00	0.00	0.00	0.00	68.00	0.00	0.00	0.00	3.50	0.00	0.00	0.00	4.90	0.00	0.00	1.30	0.00	1.70	0.00	0.00	0.00	0.00	0.00	0.00	0.00	233.60	3.70	3.80	8.00	0.00	13.10	0.00	11.00	8.70	3.70	6.80
xadapt_019	trained	0.59	2.92	12.04	8.56	0.00	3.70	3.50	12.60	6.80	5.00	0.00	1.30	1.10	1.30	0.00	0.00	49.30	0.00	0.00	0.00	6.40	0.00	0.00	0.00	4.40	0.00	0.00	9.30	0.00	0.90	0.00	0.00	0.00	0.00	0.00	0.00	2.50	87.40	3.80	1.90	12.40	10.70	15.50	0.00	6.60	0.00	0.00	4.70
xadapt_020	trained	0.7	3.64	14.39	12.58	101.20	2.10	3.60	51.30	16.90	13.90	0.00	0.00	0.00	0.00	0.00	0.00	225.60	0.00	0.00	0.00	11.20	0.00	0.00	113.40	11.40	0.00	0.00	13.10	0.00	0.00	0.00	0.00	0.00	0.00	0.00	0.00	0.00	306.90	7.70	14.80	72.70	0.00	16.00	0.00	38.40	0.00	0.00	11.10
xadapt_021	trained	0.74	3.75	15.04	7.88	0.00	4.30	4.20	47.10	4.60	12.50	0.00	0.00	3.80	0.00	0.00	0.00	120.80	0.00	3.30	2.90	6.50	0.00	0.00	0.00	7.80	0.00	0.00	29.20	0.00	1.90	0.00	0.00	0.00	0.00	0.00	0.00	0.00	225.10	7.50	5.00	21.30	0.00	18.20	0.00	19.40	0.00	0.00	10.30
xadapt_022	trained	0.68	2.4	13.95	9.9	0.00	2.40	11.00	3.00	8.80	14.00	0.00	0.00	0.00	0.00	0.00	0.00	107.30	0.00	0.00	1.80	17.50	0.00	0.00	64.00	6.80	0.00	0.00	20.60	0.00	2.00	0.00	0.00	0.00	0.00	0.00	0.00	2.20	48.50	3.00	2.10	17.60	0.00	10.60	0.00	14.40	0.00	0.00	8.50
xadapt_023	untrained	0.82	5.17	16.62	12.74	26.80	2.60	3.80	27.90	8.00	3.50	0.00	0.00	0.00	0.00	0.00	0.00	37.60	0.00	0.00	0.00	0.00	0.00	0.00	0.00	4.40	0.00	0.00	7.70	17.00	0.00	0.00	0.00	0.00	0.00	0.00	0.00	0.00	237.70	1.30	2.90	14.60	0.00	14.90	0.00	5.30	0.00	0.00	6.60
xadapt_024	untrained	0.74	3.25	15	13.32	99.90	5.90	3.00	44.80	14.90	7.00	0.00	0.00	2.00	0.00	0.00	0.00	117.10	0.00	0.00	7.80	20.70	0.00	0.00	0.00	10.30	0.00	0.00	47.10	0.00	2.50	0.00	0.00	0.00	0.00	0.00	0.00	0.00	0.00	0.00	12.30	82.80	0.00	45.90	0.00	18.30	0.00	0.00	12.60
xadapt_025	untrained	0.65	3.21	13.38	9.52	0.00	1.90	12.90	24.00	4.40	4.10	4.90	1.10	1.30	0.00	0.00	0.00	69.60	0.00	8.20	3.00	11.60	0.00	0.00	0.00	6.20	0.00	0.00	3.80	0.00	1.50	0.00	0.00	0.00	0.00	0.00	0.00	0.00	0.00	5.20	2.10	69.50	0.00	28.30	0.00	6.30	5.70	0.00	8.60
xadapt_026	untrained	0.36	4.23	7.31	5.19	0.00	3.40	3.60	14.30	9.60	0.00	0.00	0.00	0.00	0.00	0.00	0.00	67.60	0.00	0.00	0.00	10.70	0.00	0.00	0.00	7.10	0.00	0.00	7.80	0.00	0.00	0.00	0.00	0.00	0.00	0.00	23.50	0.00	0.00	5.50	5.60	26.40	0.00	26.80	0.00	6.10	0.00	0.00	6.40
xadapt_027	untrained	0.77	3.54	15.84	13.3	0.00	2.70	4.00	32.50	2.90	2.60	0.00	0.00	0.00	0.00	0.00	0.00	122.20	0.00	0.00	0.00	25.20	0.00	0.00	226.50	8.00	0.00	0.00	2.60	28.60	1.50	0.00	0.00	0.00	0.00	0.00	0.00	0.00	187.90	4.70	5.10	86.90	0.00	30.00	7.10	23.90	0.00	6.10	7.50
xadapt_029	untrained	0.84	4.03	17.01	14.3	65.60	1.10	6.50	34.30	31.00	13.00	10.80	0.00	1.50	0.00	0.00	0.00	83.80	0.00	0.00	2.10	8.90	9.90	0.00	0.00	6.60	4.70	0.00	18.60	0.00	1.50	0.00	0.00	0.00	0.00	0.00	0.00	0.00	0.00	9.60	8.20	100.30	0.00	22.00	0.00	5.20	0.00	0.00	6.80
xadapt_030	untrained	0.93	3.08	18.83	17.2	0.00	1.00	1.90	30.70	12.60	12.90	12.60	0.00	3.20	1.70	0.00	0.00	35.40	0.00	0.00	3.20	8.90	28.00	0.00	0.00	7.10	0.00	0.00	13.50	0.00	0.00	0.00	0.00	0.00	0.00	0.00	0.00	0.00	0.00	6.00	3.30	72.50	0.00	20.10	0.00	5.90	0.00	4.90	7.80
xadapt_031	untrained	0.76	3.97	15.47	12.7	58.90	1.30	8.10	23.90	16.50	13.20	0.00	0.00	0.00	1.30	0.00	0.00	90.30	0.00	0.00	0.00	10.90	0.00	0.00	0.00	6.40	0.40	0.00	13.60	0.00	2.00	0.00	0.00	23.20	0.00	0.00	0.00	0.00	0.00	8.40	8.00	52.50	0.00	25.10	0.00	7.90	0.00	5.80	9.90
xadapt_032	untrained	0.79	4.93	16.25	14.28	0.00	0.00	1.40	39.40	6.60	6.40	35.40	1.20	1.50	0.00	0.00	0.00	115.60	0.00	0.00	0.00	18.00	0.00	0.00	0.00	8.80	0.00	0.00	34.10	0.00	0.00	0.00	0.00	35.80	0.00	0.00	0.00	0.00	0.00	13.00	7.60	102.60	0.00	33.80	0.00	15.30	0.00	5.50	10.50
xadapt_033	untrained	0.83	3.21	17.07	13.74	0.00	2.80	9.90	12.10	17.90	13.70	0.00	0.00	0.00	0.00	0.00	0.00	95.60	0.00	0.80	5.70	17.60	0.00	0.00	319.80	11.20	0.00	0.00	10.00	0.00	1.70	44.20	0.00	0.00	0.00	0.00	0.00	2.50	291.30	4.90	1.80	53.30	0.00	27.20	0.00	8.30	10.70	0.00	4.90
xadapt_034	untrained	0.71	3.29	14.27	11.74	0.00	4.20	12.30	12.40	2.80	13.30	0.00	0.00	1.20	0.00	0.00	0.00	87.20	0.00	0.00	4.00	22.20	32.30	0.00	0.00	11.20	0.00	0.00	12.80	26.80	1.80	0.00	0.00	0.00	0.00	0.00	0.00	0.00	268.90	15.80	2.00	120.50	0.00	50.70	0.00	8.40	0.00	0.00	12.50
xadapt_035	trained	0.66	3.51	13.4	9.6	26.50	1.30	2.50	28.50	1.30	7.40	0.00	0.00	0.00	0.00	0.00	0.00	45.20	0.00	0.00	0.00	0.00	0.00	0.00	0.00	6.30	0.00	0.00	11.40	0.00	3.00	0.00	0.00	0.00	0.00	0.00	0.00	0.00	47.60	0.00	2.40	3.00	0.00	19.90	5.10	3.00	0.00	0.00	6.70
xadapt_036	trained	0.7	4.86	14.15	9.99	0.00	2.70	1.20	19.50	0.90	2.80	0.00	0.00	0.00	0.00	0.00	0.00	29.40	0.00	0.00	0.00	3.20	0.00	0.00	0.00	6.60	0.00	0.00	12.00	0.00	2.20	0.00	0.00	19.60	0.00	0.00	0.00	3.40	132.30	0.00	2.00	3.90	0.00	8.50	0.00	21.00	0.00	0.00	9.10
xadapt_037	trained	0.62	4.29	12.6	8.91	32.30	2.40	3.30	0.00	3.90	6.10	0.00	0.00	2.90	9.40	0.00	0.00	48.80	0.00	0.00	0.00	12.20	0.00	0.00	0.00	4.30	0.00	0.00	7.50	0.00	1.80	0.00	0.00	0.00	12.00	0.00	0.00	0.00	0.00	1.80	2.20	41.40	0.00	7.30	5.80	3.10	0.00	0.00	7.20
xadapt_038	trained	0.64	3.02	12.89	9.16	0.00	2.50	1.40	27.50	6.80	8.40	0.00	0.00	0.00	0.00	0.00	0.00	86.30	0.00	0.00	0.00	8.50	0.00	0.00	0.00	10.50	0.00	0.00	4.60	0.00	2.00	0.00	0.00	0.00	0.00	0.00	0.00	0.00	0.00	6.10	3.60	21.20	0.00	17.80	8.50	13.20	0.00	0.00	8.50
xadapt_039	trained	0.54	3.53	10.26	7.64	0.00	2.20	8.10	35.90	11.20	8.80	0.00	0.00	0.00	0.00	2.20	0.00	81.50	0.00	0.90	1.90	9.30	9.00	0.00	74.30	8.90	0.00	0.00	5.00	0.00	1.50	0.00	0.00	0.00	0.00	0.00	0.00	0.00	269.70	5.80	2.30	34.90	0.00	9.10	0.00	19.60	0.00	0.00	8.20
xadapt_040	trained	0.6	3.43	12.02	8.54	0.00	0.00	11.80	0.00	14.00	4.00	0.00	0.00	0.00	0.00	0.00	0.00	79.70	0.00	0.00	0.00	0.00	0.00	0.00	0.00	5.20	0.00	0.00	2.60	0.00	1.70	0.00	0.00	0.00	0.00	0.00	0.00	0.00	140.30	0.00	0.00	8.70	14.10	10.50	4.00	5.70	0.00	0.00	5.20
xadapt_041	trained	0.38	3.55	7.79	5.54	0.00	0.00	3.40	0.00	1.00	5.50	9.90	0.00	0.00	0.00	0.00	0.00	27.20	0.00	0.00	0.00	5.40	0.00	0.00	0.00	3.10	0.00	0.00	9.40	0.00	0.00	0.00	0.00	0.00	0.00	0.00	0.00	0.00	0.00	3.50	3.20	10.40	0.00	6.80	1.50	1.20	0.00	0.00	3.50
xadapt_042	trained	0.47	4.37	9.63	6.84	0.00	0.00	2.30	0.00	8.60	13.70	0.00	0.00	0.00	0.00	0.00	0.00	52.40	0.00	0.00	0.00	8.10	0.00	0.00	0.00	6.60	0.00	0.00	12.70	0.00	1.10	0.00	0.00	0.00	0.00	0.00	0.00	0.00	0.00	7.60	3.50	37.90	0.00	12.30	0.00	3.00	0.00	0.00	7.40
xadapt_043	trained	0.57	3.43	11.53	8.2	0.00	4.70	4.10	0.00	0.00	8.40	0.00	0.00	0.00	0.00	0.00	0.00	42.10	0.00	3.50	0.00	8.60	19.80	0.00	0.00	7.80	0.00	0.00	16.10	0.00	1.60	0.00	0.00	0.00	0.00	0.00	0.00	0.00	273.60	5.40	3.50	24.60	0.00	18.10	0.00	10.30	8.90	0.00	7.30
xadapt_044	trained	0.55	4.18	11.12	7.91	0.00	1.40	4.50	20.10	6.20	2.70	0.00	0.00	0.00	0.00	0.00	0.00	52.90	0.00	0.00	0.00	0.00	0.00	0.00	0.00	4.60	0.00	3.80	4.60	0.00	1.20	0.00	0.00	0.00	0.00	0.00	0.00	3.90	84.30	0.00	3.60	12.60	0.00	14.20	8.20	4.20	3.60	0.00	6.10
xadapt_045	trained	0.61	4.02	12.45	8.84	0.00	0.00	2.40	13.70	4.10	5.40	0.00	0.00	0.00	0.00	0.00	0.00	33.90	0.00	0.00	0.00	3.90	0.00	0.00	40.80	4.90	0.00	0.00	4.00	0.00	1.30	0.00	0.00	0.00	0.00	0.00	0.00	3.40	218.20	0.70	2.00	13.70	0.00	12.00	0.00	3.20	0.00	0.00	5.30
xadapt_046	trained	0.57	4.28	11.51	8.17	0.00	0.00	6.90	27.90	8.50	14.20	0.00	0.00	0.00	0.00	0.00	0.00	61.70	0.00	1.40	0.00	5.50	0.00	0.00	0.00	13.40	0.00	0.00	5.00	0.00	1.00	0.00	0.00	26.80	0.00	0.00	0.00	0.00	0.00	6.70	5.10	44.70	0.00	0.00	0.00	17.90	0.00	0.00	9.20
xadapt_047	untrained	0.55	3.52	11.36	8.08	0.00	2.60	7.10	4.10	9.50	21.40	7.50	15.00	2.40	0.00	0.00	0.00	93.70	0.00	0.00	4.50	15.00	0.00	0.00	0.00	6.90	0.00	0.00	11.70	0.00	2.60	0.00	0.00	0.00	0.00	0.00	0.00	0.00	0.00	3.00	5.00	2.80	0.00	19.30	0.00	6.50	8.10	5.70	5.90
xadapt_048	untrained	0.92	3.55	18.78	15.62	0.00	2.10	5.90	0.00	4.20	18.20	0.00	0.00	0.00	0.00	0.00	0.00	73.90	0.00	0.00	0.00	8.30	0.00	0.00	0.00	5.30	0.00	0.00	12.30	0.00	2.50	0.00	0.00	0.00	0.00	0.00	0.00	0.00	0.00	2.20	4.60	11.60	0.00	28.30	0.00	22.20	1.70	0.00	10.00
xadapt_049	untrained	0.57	2.46	11.92	8.47	33.30	2.80	1.60	23.60	1.10	15.40	0.00	0.00	0.00	0.00	0.00	0.00	35.20	0.00	0.00	0.00	0.00	0.00	0.00	0.00	4.30	0.00	0.00	6.20	15.90	1.80	0.00	0.00	0.00	0.00	0.00	0.00	0.00	0.00	0.00	1.40	17.70	0.00	23.50	0.00	15.00	6.90	2.80	7.60
xadapt_050	untrained	0.7	2.55	14.15	12.02	0.00	0.00	6.30	57.50	3.20	14.30	0.00	0.00	0.00	0.00	0.00	0.00	122.30	0.00	1.90	0.00	2.80	0.00	0.00	0.00	8.20	0.00	0.00	6.10	0.00	4.00	0.00	0.00	0.00	0.00	0.00	0.00	0.00	224.40	0.00	6.90	16.50	0.00	0.00	9.20	32.70	11.30	7.40	15.90
xadapt_051	untrained	0.56	3.47	11.47	8.17	0.00	1.30	1.60	49.10	3.10	12.80	0.00	0.00	0.00	2.00	0.00	0.00	91.70	0.00	0.00	1.90	5.40	0.00	0.00	45.90	7.80	0.00	0.00	9.20	19.80	0.00	0.00	0.00	0.00	0.00	0.00	0.00	1.90	0.00	3.70	3.90	15.80	0.00	33.70	6.80	12.00	2.70	0.00	9.20
xadapt_052	untrained	0.42	1.85	8.79	6.26	0.00	0.00	10.00	21.80	9.30	4.30	0.00	0.00	0.00	0.00	0.00	0.00	86.20	0.00	0.00	0.00	0.00	0.00	0.00	147.50	5.40	0.00	0.00	4.50	0.00	1.60	0.00	0.00	0.00	0.00	0.00	0.00	0.00	0.00	0.00	1.40	0.90	0.00	0.00	0.00	17.10	0.00	0.00	8.50
xadapt_053	untrained	0.73	4.18	14.82	12.24	0.00	1.10	2.80	33.30	7.20	19.70	0.00	0.00	0.00	0.00	0.00	0.00	73.20	0.00	0.00	0.00	5.40	0.00	0.00	57.10	7.30	0.00	0.00	13.00	0.00	2.20	0.00	0.00	0.00	0.00	0.00	0.00	0.00	0.00	0.00	2.30	2.40	0.00	23.20	0.00	4.30	14.30	4.60	8.30
xadapt_054	untrained	0.72	2.97	14.73	11.94	49.50	1.10	3.90	37.60	4.50	18.20	0.00	0.00	0.00	0.00	0.00	0.00	66.60	0.00	0.00	1.40	0.00	0.00	0.00	62.40	6.90	0.00	0.00	10.50	0.00	1.90	0.00	0.00	0.00	0.00	0.00	0.00	1.50	134.40	4.90	2.20	2.10	0.00	13.90	0.00	3.90	14.10	4.70	9.30
xadapt_055	untrained	0.87	3.08	17.84	14.68	0.00	2.70	12.10	26.70	9.50	7.60	0.00	0.00	0.00	0.00	0.00	0.00	92.70	0.00	0.00	0.00	17.60	0.00	0.00	0.00	6.50	0.00	0.00	16.20	0.00	2.20	0.00	0.00	37.00	0.00	0.00	0.00	0.00	259.90	7.90	9.80	129.40	0.00	13.80	10.70	25.40	10.70	0.00	12.10
xadapt_056	untrained	0.38	2.74	8	5.7	0.00	0.60	1.90	20.90	9.50	4.40	0.00	0.00	0.70	0.00	0.00	0.00	34.60	0.00	1.80	0.00	5.60	0.00	0.00	33.80	3.20	0.00	0.00	11.90	0.00	0.00	0.00	0.00	0.00	9.70	0.00	0.00	0.00	68.70	1.10	2.10	2.30	0.00	0.00	0.00	13.60	0.00	0.00	6.90
xadapt_057	untrained	0.51	3.47	10.74	7.63	0.00	0.00	1.70	1.80	3.30	2.70	0.00	2.30	0.00	0.00	0.00	0.00	40.00	0.00	0.00	1.60	2.40	8.20	0.00	27.40	2.20	0.00	0.00	5.60	0.00	0.00	0.00	0.00	13.40	0.00	0.00	0.00	0.00	0.00	1.40	4.70	1.00	11.70	13.50	0.00	8.80	0.00	0.00	4.20
xadapt_058	untrained	0.51	3.43	10.28	7.31	0.00	1.20	2.00	15.00	3.10	9.20	0.00	0.00	0.00	0.00	0.00	0.00	55.00	0.00	0.00	0.00	7.80	0.00	0.00	93.00	3.90	0.00	0.00	6.10	0.00	1.60	0.00	0.00	0.00	0.00	0.00	0.00	0.00	0.00	1.60	4.00	32.30	0.00	13.00	0.00	6.20	4.90	0.00	8.70
xadapt_059	untrained	0.24	2.4	5.15	3.67	31.60	1.90	2.80	0.00	9.10	3.80	3.70	0.00	0.90	0.00	0.00	0.00	30.20	0.00	0.00	0.00	4.00	0.00	0.00	0.00	5.70	0.00	0.00	8.20	0.00	0.00	0.00	0.00	0.00	0.00	0.00	0.00	0.00	0.00	1.70	0.00	28.10	0.00	13.60	0.00	8.70	0.00	0.00	5.60
xadapt_060	untrained	0.47	3.41	9.57	6.83	64.80	6.50	9.90	3.00	62.80	12.20	35.40	2.10	2.20	0.00	0.00	0.00	93.70	0.00	0.00	1.80	22.30	0.00	0.00	67.40	11.50	2.80	0.00	14.60	20.10	0.00	0.00	0.00	0.00	17.10	0.00	0.00	0.00	0.00	9.60	6.20	8.00	0.00	26.90	4.90	24.10	0.00	2.20	17.60
xadapt_061	untrained	0.57	5.8	11.38	8.08	78.00	2.90	18.00	8.40	34.10	7.60	24.30	0.00	4.10	0.00	0.00	0.00	59.40	0.00	4.60	10.90	42.60	0.00	0.00	0.00	9.00	0.00	0.00	31.70	0.00	2.30	0.00	0.00	45.70	0.00	0.00	0.00	0.00	0.00	11.30	23.50	0.00	0.00	34.90	0.00	6.80	0.00	0.00	17.30
xadapt_062	untrained	0.65	2.98	13.22	9.41	57.80	4.80	6.80	15.90	9.60	10.50	21.40	0.00	4.40	0.00	0.00	0.00	70.30	0.00	0.00	5.70	19.50	35.10	0.00	0.00	11.60	0.00	0.00	10.40	0.00	0.00	0.00	0.00	0.00	0.00	0.00	0.00	0.00	0.00	8.00	7.80	5.60	0.00	19.00	0.00	28.90	0.00	0.00	16.30
xadapt_063	untrained	0.7	3.61	14.33	11.92	0.00	4.90	3.70	36.40	8.20	10.20	23.20	0.00	3.40	0.00	0.00	0.00	95.10	0.00	0.00	3.70	14.00	0.00	0.00	224.70	10.70	0.00	0.00	20.00	0.00	0.00	0.00	0.00	54.70	0.00	0.00	0.00	1.60	0.00	8.10	10.00	11.10	0.00	11.00	0.00	18.10	0.00	0.00	18.40
xadapt_064	untrained	0.65	3.2	13.16	9.35	0.00	2.90	1.60	23.60	5.60	9.10	9.50	0.00	3.30	1.30	0.00	0.00	63.40	0.00	0.00	0.00	7.90	24.60	22.00	0.00	9.10	0.00	0.00	2.90	26.60	2.20	0.00	0.00	0.00	0.00	0.00	0.00	0.00	0.00	4.70	6.20	5.90	36.60	0.00	3.90	6.60	0.00	0.00	14.10
xadapt_065	untrained	0.78	5.46	15.44	9.66	0.00	5.80	3.50	45.00	12.10	9.30	0.00	0.00	4.00	0.00	0.00	0.00	66.70	0.00	0.00	0.00	17.60	0.00	0.00	150.70	8.50	4.70	0.00	7.60	0.00	0.00	0.00	0.00	0.00	0.00	0.00	0.00	0.00	254.30	3.40	4.30	10.10	0.00	12.40	5.50	29.90	0.00	0.00	13.10
xadapt_066	untrained	0.83	3.43	16.97	7.32	0.00	2.70	4.50	79.90	12.80	6.00	0.00	0.00	4.90	0.00	0.00	0.00	38.80	0.00	0.00	0.00	29.00	0.00	0.00	165.60	8.10	0.00	0.00	9.20	0.00	0.00	0.00	0.00	0.00	0.00	0.00	0.00	0.00	0.00	4.20	5.30	13.80	0.00	0.00	0.00	7.60	0.00	0.00	14.10
xadapt_067	untrained	0.73	3.77	14.87	11.02	63.30	0.60	8.60	50.00	4.80	6.50	16.50	0.00	2.10	0.00	0.00	0.00	69.00	0.00	0.00	0.00	14.50	0.00	0.00	52.60	7.40	0.00	0.00	18.40	0.00	2.00	0.00	0.00	0.00	0.00	0.00	0.00	0.00	185.50	5.50	6.00	49.50	0.00	19.70	5.20	5.20	9.20	0.00	13.90
xadapt_068	untrained	0.92	4.5	18.46	7.81	0.00	0.00	1.60	0.00	0.30	3.20	0.00	0.00	0.00	1.70	0.00	0.00	52.50	0.00	0.00	0.00	6.30	0.00	0.00	0.00	7.20	0.00	0.00	3.70	0.00	1.60	0.00	0.00	18.00	22.30	0.00	0.00	1.50	0.00	2.90	2.80	10.50	0.00	9.40	0.00	7.20	9.80	0.00	7.80
xadapt_069	untrained	0.68	3.45	14.23	11.94	0.00	2.00	4.30	28.90	21.60	1.00	0.00	0.00	0.00	0.00	0.00	0.00	40.10	0.00	0.00	5.40	8.90	0.00	0.00	67.70	11.10	0.00	9.30	0.00	0.00	0.00	0.00	0.00	0.00	0.00	0.00	0.00	0.00	0.00	5.20	2.50	7.30	0.00	24.40	0.00	25.70	13.80	0.00	18.20
xadapt_070	untrained	0.83	3.68	16.98	14.66	0.00	0.00	6.80	12.80	8.70	8.10	0.00	0.00	2.70	0.00	0.00	0.00	153.50	0.00	0.00	0.00	13.80	0.00	0.00	260.40	15.50	0.00	0.00	18.70	0.00	2.00	0.00	0.00	0.00	0.00	0.00	0.00	0.00	358.20	10.30	12.70	7.80	0.00	0.00	0.00	9.00	0.00	0.70	25.30
xadapt_071	untrained	0.43	4.64	9.25	6.59	0.00	3.10	7.90	27.00	19.20	8.70	0.00	0.00	0.00	0.00	0.00	0.00	61.70	0.00	0.00	0.00	2.70	0.00	0.00	0.00	9.60	0.00	0.00	17.40	20.90	7.20	0.00	0.00	0.00	0.00	0.00	0.00	0.00	0.00	1.70	6.70	34.80	40.00	14.90	0.00	10.10	8.60	0.00	5.00
xadapt_072	untrained	0.42	4.18	8.62	6.12	0.00	3.20	12.00	16.00	2.80	8.10	0.00	0.00	0.00	0.00	0.00	0.00	62.90	0.00	0.00	0.00	0.00	2.50	0.00	0.00	9.80	0.00	0.00	5.20	0.00	7.20	0.00	0.00	0.00	0.00	0.00	0.00	0.00	0.00	2.30	3.30	23.30	40.30	13.70	0.00	4.10	0.00	0.00	5.00
xadapt_073	untrained	0.3	4.13	6.18	4.39	30.20	2.20	15.40	15.70	25.10	7.30	0.00	0.00	0.00	0.00	0.00	0.00	38.20	0.00	0.00	0.00	3.10	0.00	10.30	31.20	5.90	0.00	0.00	10.70	0.00	0.00	0.00	0.00	0.00	0.00	0.00	0.00	2.20	0.00	2.90	0.00	23.50	0.00	12.40	0.00	5.60	0.00	0.00	3.50
xadapt_075	untrained	0.29	3.51	5.96	4.25	0.00	1.10	1.30	64.90	0.30	3.10	0.00	0.00	0.00	0.00	0.00	0.00	51.10	0.00	0.00	0.00	10.70	0.00	0.00	0.00	5.80	0.00	0.00	4.60	0.00	0.00	0.00	0.00	0.00	0.00	0.00	0.00	0.00	0.00	1.80	3.90	25.80	0.00	12.10	0.00	5.80	0.00	0.00	3.00
xadapt_076	untrained	0.45	2.3	9.46	6.72	41.20	3.40	1.70	30.00	16.80	5.60	0.00	0.00	0.00	0.00	0.00	0.00	49.00	0.00	0.00	0.00	3.40	11.30	0.00	43.00	8.40	5.90	0.00	2.30	0.00	0.00	0.00	0.00	0.00	0.00	0.00	0.00	3.00	166.40	3.80	1.50	23.20	0.00	17.80	0.00	6.50	0.00	0.00	4.80
xadapt_077	untrained	0.57	4.81	11.82	8.42	0.00	2.10	14.60	0.00	7.40	4.20	13.50	0.00	0.70	0.00	1.20	0.00	40.00	0.00	0.00	0.00	13.50	12.20	10.40	53.30	6.10	0.00	0.00	3.90	0.00	5.70	0.00	0.00	13.20	0.00	0.00	0.00	4.90	0.00	3.20	2.50	15.60	0.00	14.30	0.00	2.90	5.70	0.00	5.20
xadapt_082	untrained	0.46	3.6	9.38	6.67	0.00	3.60	10.90	33.50	39.20	0.00	0.00	0.00	0.00	0.00	0.00	0.00	69.20	0.00	5.00	2.00	1.70	17.10	0.00	0.00	7.70	0.00	0.00	4.30	5.80	0.00	0.00	0.00	0.00	0.00	0.00	0.00	0.50	0.00	6.20	1.50	29.00	0.00	16.50	0.00	3.00	0.00	0.00	5.30
xadapt_083	untrained	0.44	4.28	9.03	6.38	0.00	5.40	12.10	40.30	5.70	4.30	0.00	0.00	0.00	0.00	0.00	0.00	86.60	0.00	0.00	0.00	1.80	0.00	0.00	0.00	11.30	0.00	0.00	7.00	0.00	0.00	0.00	0.00	0.00	0.00	0.00	0.00	15.70	0.00	0.00	1.60	14.80	0.00	23.40	0.00	5.20	0.00	0.00	6.30
xadapt_085	untrained	0.76	3.18	15.43	9.88	0.00	1.70	22.60	0.00	40.30	36.40	0.00	1.70	0.00	0.00	0.00	0.00	88.90	0.00	0.00	3.70	11.60	0.00	0.00	71.40	19.90	0.00	0.00	5.70	0.00	2.30	0.00	0.00	0.00	0.00	0.00	0.00	10.50	250.40	5.60	3.10	6.80	0.00	17.10	0.00	21.60	0.00	4.60	6.60
xadapt_086	untrained	0.56	3.71	11.26	7.99	0.00	2.20	2.50	24.50	10.20	17.90	0.00	0.00	5.90	0.00	0.00	0.00	82.60	0.00	0.00	3.80	6.40	20.20	0.00	0.00	13.80	0.00	0.00	19.80	0.00	0.00	0.00	0.00	0.00	0.00	0.00	0.00	0.00	0.00	7.60	10.10	78.90	0.00	12.50	5.50	13.50	0.00	1.90	5.20
xadapt_087	untrained	0.33	4.49	6.79	4.84	0.00	1.50	3.50	15.60	1.20	8.50	0.00	0.80	0.40	0.00	0.00	0.00	42.10	0.00	0.00	1.70	8.60	0.00	0.00	0.00	11.30	0.00	0.00	9.30	0.00	0.00	0.00	0.00	20.70	0.00	0.00	0.00	4.40	0.00	6.10	1.90	44.10	0.00	15.90	0.00	2.10	5.80	0.00	5.50
xadapt_088	untrained	0.36	4.63	7.51	5.34	0.00	1.30	1.60	16.20	1.10	1.50	0.00	0.00	0.00	0.00	0.00	0.00	59.00	0.00	0.00	0.00	10.40	0.00	0.00	44.00	6.30	0.00	0.00	19.40	0.00	2.10	0.00	0.00	0.00	0.00	0.00	0.00	0.00	222.50	5.20	0.00	43.70	0.00	14.50	0.00	5.20	0.00	0.00	6.30
xadapt_089	untrained	0.69	3.7	14.18	12.26	28.60	2.90	8.30	0.00	3.00	4.60	0.00	0.00	0.00	0.00	0.00	0.00	42.00	0.00	0.00	0.00	0.00	0.00	0.00	0.00	9.20	0.00	0.00	24.90	0.00	3.10	0.00	0.00	0.00	0.00	0.00	0.00	2.60	0.00	2.80	9.90	26.10	0.00	22.60	0.00	18.20	0.00	0.00	11.30
xadapt_090	untrained	0.32	6.35	6.75	4.8	0.00	0.00	3.80	0.00	12.60	6.00	0.00	0.00	0.00	0.00	0.00	0.00	38.10	0.00	0.00	0.00	0.00	12.70	0.00	0.00	6.20	0.00	0.00	10.70	0.00	0.00	0.00	0.00	0.00	0.00	0.00	0.00	0.00	0.00	0.00	1.80	3.20	0.00	6.20	0.00	5.90	0.00	0.00	4.90
xadapt_091	untrained					28.40	0.90	4.10	22.10	4.30	16.30	0.00	0.00	0.00	0.00	0.00	0.00	54.70	0.00	0.00	0.00	0.00	0.00	0.00	0.00	7.90	0.00	0.00	0.90	12.30	0.00	0.00	0.00	0.00	0.00	0.00	0.00	0.00	0.00	1.00	3.00	21.80	0.00	11.10	3.30	9.90	6.90	0.00	6.90
xadapt_092	untrained	0.32	3.97	6.57	4.67	0.00	3.80	6.70	39.90	5.70	2.80	0.00	0.00	0.00	0.00	0.00	0.00	47.40	0.00	0.00	0.00	0.00	0.00	0.00	0.00	6.60	0.00	0.00	8.30	0.00	5.50	0.00	0.00	0.00	0.00	0.00	0.00	1.80	0.00	0.00	1.50	10.20	0.00	21.30	3.80	5.60	0.00	0.00	2.60
xadapt_093	untrained	0.21	3.84	4.32	3.07	0.00	0.00	0.60	8.10	0.20	2.00	0.00	0.00	0.00	0.00	0.00	0.00	8.00	0.00	0.00	0.00	1.10	3.60	0.00	0.00	2.00	0.00	0.00	5.30	5.20	0.30	0.00	0.00	0.00	0.00	0.00	0.00	0.00	45.30	0.50	1.80	7.70	4.30	2.40	0.00	2.60	0.00	0.00	2.10
xadapt_094	untrained	0.66	4.86	13.52	9.6	0.00	2.30	4.20	0.00	4.10	13.50	0.00	0.00	0.00	0.00	0.00	0.00	47.60	0.00	0.00	2.40	15.50	14.80	0.00	204.70	8.70	0.00	0.00	9.50	0.00	0.00	0.00	0.00	30.50	0.00	0.00	0.00	0.00	0.00	4.00	9.00	26.00	0.00	21.10	0.00	9.20	10.10	0.00	13.00
xadapt_095	untrained	0.52	2.37	11.54	8.22	45.30	1.90	1.90	0.00	5.90	4.30	0.00	0.00	0.00	0.00	0.00	0.00	34.50	0.00	0.00	0.00	0.00	16.40	0.00	0.00	7.90	0.00	0.00	14.60	0.00	0.00	0.00	0.00	0.00	0.00	0.00	0.00	0.00	0.00	0.00	4.50	12.30	0.00	13.30	0.00	20.60	9.70	0.00	9.90
xadapt_096	untrained	0.49	2.84	10.09	7.18	0.00	1.60	2.90	12.90	9.20	3.90	0.00	0.00	0.00	0.00	0.00	0.00	27.30	0.00	0.00	0.00	4.30	0.00	0.00	0.00	6.50	0.00	0.00	11.00	15.60	0.00	0.00	0.00	0.00	0.00	0.00	0.00	0.00	0.00	1.80	2.30	13.30	0.00	14.50	3.90	6.60	5.30	0.00	7.00
xadapt_097	untrained	0.42	3.71	8.6	6.13	0.00	1.50	1.90	0.00	7.80	7.20	0.00	0.00	0.00	0.00	0.00	0.00	54.50	0.00	0.00	0.00	0.00	0.00	0.00	0.00	7.80	0.00	0.00	6.00	0.00	1.70	0.00	0.00	0.00	0.00	0.00	0.00	0.00	0.00	1.20	9.40	19.10	0.00	11.80	3.10	11.60	0.00	0.00	6.50
xadapt_098	untrained	0.58	2.09	12.17	8.7	0.00	4.30	4.30	32.90	2.00	2.50	0.00	0.00	0.00	0.00	0.00	0.00	130.20	0.00	0.00	0.00	22.20	0.00	0.00	0.00	16.50	0.00	0.00	18.40	16.80	1.30	0.00	0.00	0.00	0.00	0.00	0.00	0.00	373.20	4.70	6.30	3.80	0.00	52.40	0.00	8.00	0.00	0.00	12.60
xadapt_099	untrained	0.49	3.14	9.92	7.04	36.10	0.00	4.20	25.50	0.80	13.80	0.00	0.00	0.00	0.00	0.00	0.00	34.70	0.00	0.00	0.00	0.00	18.10	0.00	0.00	12.60	0.00	0.00	12.30	0.00	2.30	0.00	0.00	32.40	0.00	0.00	0.00	0.00	95.70	2.30	2.10	22.50	0.00	17.60	0.00	5.00	9.00	0.00	10.40
xadapt_100	trained	0.26	2.41	5.33	3.79	28.60	2.10	7.00	0.00	5.90	5.00	0.00	0.00	0.00	0.00	0.00	0.00	0.00	0.00	0.00	1.70	5.60	0.00	0.00	0.00	6.40	3.00	0.80	6.60	0.00	0.60	0.00	0.00	0.00	0.00	0.00	0.00	0.00	132.10	2.70	2.40	0.50	0.00	9.30	0.00	1.90	10.30	0.00	3.30
xadapt_101	trained	0.47	2.66	9.58	6.8	0.00	0.60	8.10	33.50	20.50	9.30	16.50	0.00	4.40	0.00	0.00	0.00	139.80	0.00	0.00	7.30	12.40	0.00	0.00	72.50	15.50	5.90	0.00	23.50	0.00	0.00	0.00	0.00	0.00	0.00	0.00	0.00	1.80	0.00	5.50	3.10	19.30	0.00	32.00	0.00	14.30	0.00	2.50	6.70
xadapt_103	trained	0.47	3.59	9.54	6.77	0.00	4.00	5.40	22.90	10.00	3.90	28.80	0.00	1.00	0.00	0.00	0.00	119.20	0.00	0.00	1.10	3.50	0.00	0.00	0.00	12.90	0.00	0.00	3.10	0.00	0.70	0.00	0.00	0.00	0.00	0.00	0.00	0.00	108.70	2.40	5.70	23.30	0.00	16.50	0.00	11.60	0.00	0.00	7.30
xadapt_104	trained	0.31	3.31	6.28	4.46	0.00	1.10	1.00	10.10	3.90	4.50	6.80	0.00	1.50	0.00	0.00	0.90	23.10	0.00	0.00	1.70	6.30	0.00	0.00	0.00	4.80	0.00	0.00	8.90	0.00	0.60	0.00	0.00	0.00	0.00	0.00	0.00	3.70	0.00	1.70	2.10	15.80	0.00	10.60	0.00	4.90	5.20	0.00	3.00
xadapt_105	trained	0.39	3.7	7.85	5.58	0.00	0.90	1.60	12.80	3.20	5.20	0.00	0.00	0.00	0.00	0.00	0.00	32.40	0.00	0.00	0.00	0.00	0.00	0.00	27.60	5.80	0.00	0.00	8.20	0.00	0.00	0.00	0.00	0.00	0.00	0.00	0.00	0.00	0.00	1.80	1.80	7.50	17.20	14.90	0.00	6.50	4.90	0.00	4.50
xadapt_106	trained	0.14	3.29	2.78	1.98	0.00	1.40	1.70	2.10	9.80	5.00	0.00	0.00	0.00	0.00	0.00	0.00	0.00	0.00	0.00	0.00	0.00	0.00	0.00	0.00	2.80	0.80	0.00	4.50	0.00	0.80	0.00	0.00	0.00	0.00	0.00	0.00	0.00	0.00	0.00	2.80	9.60	0.00	6.40	0.00	2.90	2.80	0.00	1.90
xadapt_107	trained	0.27	3.35	5.59	3.97	0.00	1.40	3.10	0.00	3.90	3.00	0.00	0.00	0.00	0.00	0.00	0.00	30.00	0.00	0.00	0.00	0.00	0.00	0.00	69.80	3.80	0.00	0.00	11.40	0.00	0.60	0.00	0.00	0.00	0.00	0.00	0.00	0.00	0.00	0.40	1.80	2.60	0.00	6.60	3.10	3.00	5.10	0.00	2.70
xadapt_108	trained	0.26	4.14	5.39	3.83	0.00	1.50	3.90	7.30	7.20	3.20	5.00	3.50	2.20	5.50	0.00	0.00	91.10	0.00	0.00	6.40	8.50	0.00	0.00	43.40	6.10	0.00	0.00	14.20	0.00	0.00	0.00	0.00	0.00	0.00	0.00	0.00	0.00	0.00	4.40	0.00	2.00	0.00	4.30	0.00	2.10	0.00	0.00	5.00
xadapt_109	trained	0.35	2.48	7.07	5.02	0.00	1.30	0.00	6.90	10.10	3.40	0.00	0.90	0.00	0.00	0.00	0.00	43.50	0.00	0.00	0.00	3.80	0.00	0.00	86.10	5.10	0.00	2.90	12.30	0.00	0.80	0.00	0.00	0.00	0.00	0.00	0.00	0.00	0.00	2.00	1.10	21.60	32.40	14.70	2.20	5.00	0.00	1.10	2.70
xadapt_110	trained	0.54	3.05	10.89	7.74	0.00	4.30	15.70	38.70	46.70	10.30	7.50	0.00	0.00	0.00	0.00	0.00	48.10	0.00	0.00	0.00	18.10	0.00	0.00	0.00	10.80	0.00	0.00	20.50	0.00	0.00	0.00	0.00	0.00	0.00	0.00	0.00	1.60	169.10	4.60	10.60	12.20	0.00	19.40	0.00	3.10	0.00	1.90	6.00
xadapt_111	trained	0.19	3.64	3.98	2.82	0.00	0.30	5.70	2.60	6.20	2.90	0.00	0.00	0.50	0.00	0.00	0.00	12.10	0.00	0.00	0.00	2.50	4.20	0.00	0.00	2.50	0.20	0.00	2.00	0.00	1.80	0.00	0.00	5.10	0.00	1.10	0.00	0.00	29.20	1.60	1.40	4.50	10.00	4.40	0.50	1.40	2.20	0.00	1.40
xadapt_115	untrained	0.84	3.22	17.36	12.24	61.60	1.40	11.80	5.70	6.30	22.90	18.50	0.00	0.00	5.60	1.30	0.00	86.30	0.00	0.00	0.00	5.50	0.00	23.50	0.00	14.30	0.00	0.00	6.00	0.00	1.90	0.00	0.00	0.00	0.00	0.00	0.00	0.00	0.00	4.10	2.20	19.80	0.00	32.50	0.00	5.20	0.00	0.00	9.30
xadapt_116	untrained	0.74	5.05	15.39	11.58	0.00	0.00	1.40	25.70	6.10	17.10	0.00	0.00	0.00	0.00	0.00	0.00	74.20	0.00	0.00	0.00	13.70	0.00	0.00	0.00	13.10	0.00	0.00	19.20	30.20	1.80	0.00	0.00	0.00	0.00	0.00	0.00	0.00	332.30	0.00	7.10	37.20	17.20	33.30	7.30	9.90	0.00	5.20	15.70
xadapt_117	untrained	0.72	3.01	14.91	12.72	0.00	6.00	21.00	0.00	25.60	7.70	0.00	0.00	0.00	0.00	0.00	0.00	109.20	0.00	0.00	6.10	16.40	0.00	0.00	51.90	14.30	0.00	0.00	5.10	30.40	1.90	0.00	0.00	0.00	0.00	0.00	0.00	6.10	0.00	8.60	10.80	13.60	0.00	30.80	8.20	8.40	0.00	5.80	15.80
xadapt_118	untrained	0.69	2.67	14.14	11.84	0.00	0.00	4.80	8.50	19.00	7.50	0.00	1.00	0.00	5.50	0.00	0.00	87.10	0.00	0.00	0.00	5.40	0.00	0.00	0.00	9.90	0.00	0.00	12.60	0.00	1.70	0.00	0.00	22.60	0.00	0.00	0.00	0.00	254.80	5.40	5.00	17.50	0.00	0.00	6.00	5.50	0.00	0.00	11.50
xadapt_119	untrained	0.59	2.69	12.15	8.66	18.50	1.80	3.40	7.10	5.10	5.20	0.00	0.00	0.00	0.00	0.00	0.00	35.10	0.00	0.00	0.00	4.60	0.00	16.10	46.80	8.20	0.00	0.00	2.80	0.00	2.00	0.00	0.00	0.00	0.00	0.00	0.00	0.00	182.30	2.40	0.00	11.30	0.00	12.80	3.70	6.60	0.00	0.00	6.70
xadapt_120	untrained	0.75	2.01	15.37	12.88	0.00	0.00	10.70	47.70	14.50	9.60	0.00	0.00	0.00	0.00	0.00	0.00	103.50	0.00	0.00	3.20	16.60	0.00	0.00	67.60	14.30	0.00	0.00	20.70	0.00	0.00	0.00	0.00	31.70	0.00	0.00	0.00	0.00	235.50	3.10	4.30	14.60	0.00	0.00	3.00	9.00	13.40	6.10	15.60
xadapt_122	untrained	0.79	3.87	15.98	13.24	0.00	3.30	2.90	0.00	16.70	3.30	0.00	2.90	0.00	0.00	0.00	0.00	89.40	0.00	0.00	0.00	9.00	0.00	0.00	0.00	9.60	0.00	0.00	5.90	0.00	0.00	0.00	0.00	0.00	0.00	0.00	0.00	0.00	285.60	5.10	3.60	20.10	10.50	14.70	0.00	18.80	11.80	4.40	12.20
xadapt_123	untrained	0.77	3.54	15.71	11.58	0.00	3.90	2.30	30.20	10.50	4.50	5.70	0.00	3.50	0.00	10.60	0.00	95.70	0.00	0.00	0.00	12.80	0.00	0.00	0.00	12.40	0.00	0.00	16.10	0.00	0.00	0.00	0.00	0.00	0.00	0.00	0.00	0.00	329.90	4.60	5.20	24.90	0.00	29.00	0.00	22.50	0.00	0.00	12.80
xadapt_124	trained	0.94	4.34	18.89	16.68	0.00	0.00	1.70	5.10	2.70	3.90	0.00	0.00	0.00	0.00	0.00	0.00	36.70	0.00	0.00	0.00	0.00	0.00	0.00	0.00	4.10	0.00	0.00	2.50	0.00	1.30	0.00	0.00	0.00	5.70	0.00	0.00	0.00	0.00	0.00	3.30	9.90	0.00	11.10	0.00	6.50	0.00	0.00	3.00
xadapt_125	trained	0.83	3.3	16.83	14.66	0.00	1.70	7.10	27.00	11.00	18.30	0.00	0.00	0.00	0.00	0.00	0.00	39.40	0.00	0.00	2.60	2.90	0.00	0.00	0.00	11.70	0.00	0.00	20.00	0.00	0.00	0.00	0.00	0.00	0.00	0.00	0.00	1.00	0.00	13.60	6.10	38.10	0.00	30.10	0.00	19.50	0.00	6.00	10.40
xadapt_126	trained	0.83	3.73	16.67	7.09	0.00	0.00	7.10	0.00	11.00	7.00	0.00	0.00	0.00	0.00	0.00	0.00	74.20	0.00	0.00	0.00	4.30	0.00	0.00	0.00	8.80	0.00	0.00	5.20	0.00	0.00	0.00	0.00	0.00	0.00	0.00	0.00	0.00	0.00	0.00	3.00	9.90	0.00	0.00	0.00	21.00	0.00	0.00	8.50
xadapt_127	trained	0.7	3.45	14.07	9.95	0.00	1.80	4.30	0.00	5.30	9.70	0.00	0.00	0.00	0.00	0.00	0.00	80.80	0.00	0.00	2.90	8.90	0.00	0.00	55.10	6.10	0.00	0.00	6.70	0.00	2.30	0.00	0.00	0.00	0.00	0.00	0.00	0.90	0.00	2.60	5.60	17.60	0.00	7.40	0.00	4.70	0.00	0.00	8.60
xadapt_128	trained	0.65	4.33	13.28	9.44	0.00	2.10	0.00	0.00	8.00	17.70	14.30	0.00	0.00	0.00	0.00	0.00	63.90	0.00	0.00	2.20	6.10	0.00	0.00	0.00	11.50	0.00	0.00	5.40	0.00	0.00	0.00	0.00	0.00	0.00	0.00	0.00	2.10	0.00	4.60	1.00	30.30	0.00	0.00	5.70	16.20	0.00	0.00	11.60
xadapt_129	trained	0.7	3.92	14.35	12.74	0.00	1.10	2.60	20.10	12.40	5.40	0.00	0.00	0.00	0.00	0.00	0.00	73.90	0.00	0.00	1.40	10.00	0.00	0.00	0.00	7.90	0.00	0.00	5.50	0.00	0.00	0.00	0.00	0.00	0.00	0.00	0.00	0.00	175.10	5.00	5.20	23.50	0.00	19.20	0.00	5.30	0.00	0.00	8.90
xadapt_130	trained	0.75	2.39	15.18	12.76	0.00	0.00	0.00	19.60	12.90	11.10	0.00	0.00	0.00	0.00	0.00	0.00	63.70	0.00	0.00	0.00	7.10	0.00	0.00	0.00	9.40	0.00	0.00	13.20	0.00	0.00	0.00	0.00	29.30	0.00	0.00	0.00	0.00	252.30	1.70	6.20	12.10	0.00	19.40	7.90	6.50	0.00	0.00	7.50
xadapt_131	trained	0.87	2.84	17.5	13.56	0.00	0.00	8.80	0.00	6.20	6.50	43.30	0.00	4.20	7.60	0.00	0.00	91.90	0.00	0.00	0.00	24.30	0.00	0.00	73.50	7.40	0.00	0.00	7.40	0.00	0.00	0.00	0.00	0.00	0.00	0.00	0.00	0.00	0.00	4.90	8.10	23.70	0.00	14.50	0.00	18.00	17.30	0.00	7.60
xadapt_132	trained	0.79	2.99	16.27	14.02	0.00	2.80	3.00	13.00	17.60	0.00	0.00	0.00	0.00	0.00	0.00	0.00	104.20	0.00	0.00	0.00	16.80	0.00	0.00	0.00	6.60	0.00	0.00	5.30	0.00	1.90	0.00	0.00	0.00	0.00	0.00	0.00	0.00	0.00	2.90	5.30	5.70	0.00	27.60	7.30	18.40	10.60	0.00	8.60
xadapt_133	trained	0.63	3.57	12.75	8.95	0.00	3.70	0.00	7.50	23.30	7.50	0.00	0.00	0.00	0.00	0.00	0.00	111.70	0.00	0.00	3.10	11.10	0.00	0.00	72.00	14.30	0.00	0.00	21.90	25.90	2.20	0.00	0.00	0.00	0.00	0.00	0.00	0.00	142.10	7.90	0.00	8.80	0.00	36.90	1.90	23.30	0.00	0.00	8.30
xadapt_134	trained	0.79	3.55	16.15	13.56	118.60	3.80	5.20	0.00	24.10	12.70	0.00	0.00	0.00	0.00	0.00	0.00	124.70	0.00	0.00	4.70	13.80	0.00	0.00	79.50	11.00	1.00	0.00	10.00	0.00	0.90	0.00	0.00	0.00	0.00	0.00	0.00	0.00	0.00	4.40	13.20	31.80	0.00	33.60	9.10	24.20	13.20	2.30	7.80
xadapt_135	trained	0.67	3.89	13.64	9.68	0.00	3.90	7.80	4.50	4.00	10.30	32.70	0.00	0.00	0.00	0.00	0.00	102.40	0.00	0.00	0.00	12.50	0.00	0.00	0.00	11.80	5.40	0.00	27.00	0.00	1.80	0.00	0.00	0.00	0.00	0.00	0.00	0.00	0.00	7.70	15.00	20.30	0.00	30.00	0.00	16.00	0.00	1.80	6.50
xadapt_136	untrained	0.4	2.17	8.25	5.88	0.00	0.80	2.30	0.00	1.30	4.30	0.00	0.00	0.00	0.00	0.00	0.00	31.10	0.00	0.00	0.00	3.20	8.70	0.00	0.00	5.00	0.00	2.50	5.60	0.00	0.90	0.00	0.00	0.00	0.00	0.00	0.00	0.00	0.00	0.60	0.00	3.40	0.00	0.00	0.90	3.10	0.00	1.00	4.80
xadapt_137	untrained	0.24	2.5	5.09	3.63	0.00	3.20	1.30	0.00	5.90	3.40	0.00	0.00	0.00	0.00	0.00	0.00	11.70	0.00	0.00	0.00	0.00	0.00	0.00	0.00	2.70	0.00	0.60	0.00	5.90	0.00	0.00	0.00	7.80	0.00	0.00	0.00	0.00	0.00	0.00	0.00	1.00	0.00	0.00	0.00	4.00	0.00	0.00	3.70
xadapt_139	untrained	0.24	4.51	5.07	3.61	0.00	0.90	2.80	0.00	23.60	3.40	0.00	0.00	0.00	0.00	0.00	0.00	27.10	0.00	0.00	0.00	0.00	0.00	6.10	0.00	4.40	0.00	0.00	4.10	0.00	0.90	0.00	0.00	0.00	0.00	0.00	0.00	0.00	0.00	0.00	4.30	1.70	0.00	5.70	0.00	3.50	0.00	0.00	4.10
xadapt_140	untrained	0.23	6.02	4.67	3.31	0.00	2.40	0.90	0.00	5.30	3.90	0.00	0.00	0.00	0.00	0.00	0.00	17.90	0.00	0.00	0.00	0.00	0.00	0.00	0.00	4.10	0.00	0.00	0.00	0.00	0.00	0.00	0.00	0.00	0.00	0.00	0.00	0.00	48.40	0.00	0.00	8.40	0.00	10.20	0.00	2.70	0.00	0.00	3.30
xadapt_141	untrained	0.19	2.91	3.94	2.81	0.00	0.10	0.50	0.00	1.80	2.60	0.00	0.00	0.00	0.00	0.00	0.00	10.90	0.00	0.00	0.00	0.00	3.40	0.00	0.00	3.00	0.00	0.50	0.00	0.00	0.00	0.00	0.00	0.00	0.00	0.00	0.00	2.50	0.00	0.00	0.00	1.70	0.00	0.00	0.00	1.80	1.90	0.00	2.30
xadapt_142	untrained	0.22	3.67	4.41	3.13	0.00	1.30	1.20	20.50	2.10	0.00	0.00	0.00	0.00	0.00	0.00	0.00	17.50	0.00	0.00	0.00	2.60	0.00	0.00	0.00	5.70	0.00	0.00	1.50	0.00	0.00	0.00	0.00	0.00	0.00	0.00	0.00	0.50	0.00	2.30	2.10	2.50	0.00	8.60	3.00	3.70	0.00	0.00	4.10
xadapt_143	untrained	0.29	2.48	5.89	4.2	0.00	0.20	0.50	16.50	4.20	2.90	0.00	0.00	0.00	0.00	0.00	0.00	35.70	0.00	0.60	0.00	0.00	6.50	0.00	0.00	3.80	0.00	3.20	2.30	0.00	0.80	0.00	0.00	0.00	0.00	0.00	0.00	0.00	0.00	0.00	3.10	4.80	0.00	0.00	1.80	3.70	0.00	0.00	4.20
xadapt_144	untrained	0.22	3.43	4.57	3.27	0.00	0.00	0.00	0.00	1.10	0.00	0.00	0.00	0.00	0.00	0.00	0.00	17.70	0.00	0.00	0.00	0.00	4.90	0.00	0.00	2.50	0.00	0.00	0.00	0.00	0.00	0.00	0.00	0.00	0.00	0.00	0.00	0.00	0.00	0.00	1.50	0.00	0.00	0.00	1.60	2.60	2.30	0.00	2.90
xadapt_145	untrained	0.3	3.65	6.33	4.5	0.00	0.30	1.30	0.00	1.70	3.40	0.00	0.00	0.00	0.00	0.00	0.00	14.10	0.00	0.00	0.00	0.00	0.00	0.00	0.00	4.20	0.00	0.00	5.60	0.00	0.00	0.00	0.00	0.00	0.00	0.00	0.00	0.00	0.00	0.00	1.40	2.40	0.00	3.90	2.50	3.80	0.00	0.90	5.30
xadapt_146	untrained	0.35	2.65	7.21	5.12	0.00	0.80	0.40	0.00	1.40	1.70	0.00	0.00	0.00	0.00	0.00	0.00	14.60	0.00	0.00	0.00	0.00	1.90	0.00	0.00	6.10	0.00	0.00	1.20	0.00	0.00	0.00	0.00	0.00	0.00	0.00	0.00	0.00	0.00	0.00	0.00	2.80	0.00	1.50	0.00	4.70	0.00	0.00	5.00
xadapt_147	untrained	0.22	3.62	4.52	3.21	0.00	0.90	0.00	16.20	4.60	3.90	0.00	0.00	0.00	0.00	0.00	0.00	24.20	0.00	0.00	0.00	0.00	0.00	0.00	0.00	6.60	0.00	0.00	1.70	0.00	0.00	0.00	0.00	0.00	0.00	0.00	0.00	0.00	47.30	0.00	0.00	1.90	0.00	7.70	0.00	4.80	4.70	0.00	4.40
xadapt_148	trained	0.83	3.55	17.05	14.1	69.70	0.00	7.70	35.00	10.80	21.50	0.00	0.00	0.00	0.00	0.00	0.00	93.90	0.00	0.00	3.40	16.80	0.00	0.00	65.80	12.20	0.00	0.00	27.40	0.00	0.00	0.00	0.00	0.00	0.00	0.00	0.00	0.00	0.00	7.20	8.90	7.60	0.00	42.10	0.00	3.30	10.80	3.10	7.50
xadapt_149	trained	0.74	3.63	15.27	12.66	0.00	2.80	4.00	31.70	15.20	27.20	3.90	0.00	1.80	0.00	0.00	0.00	99.90	0.00	0.00	0.00	9.60	0.00	0.00	63.80	9.80	0.00	0.00	20.20	0.00	0.00	0.00	0.00	0.00	0.00	0.00	0.00	18.20	0.00	7.80	12.20	10.30	0.00	12.60	0.00	4.20	0.00	1.40	7.00
xadapt_150	trained	0.48	4.97	10.17	7.23	0.00	4.00	4.20	0.00	28.20	20.50	17.50	0.00	0.00	9.50	0.00	0.00	88.80	0.00	0.00	2.10	13.90	0.00	0.00	0.00	10.80	11.30	0.00	45.40	0.00	0.00	0.00	0.00	0.00	0.00	0.00	0.00	1.60	0.00	6.00	9.80	25.90	0.00	7.10	4.70	5.00	0.00	0.00	5.30
xadapt_151	trained	0.75	4.25	15.02	13.76	146.10	3.90	20.50	0.00	58.80	21.60	40.80	0.00	14.10	0.00	0.00	0.00	200.60	0.00	0.00	3.10	20.90	0.00	0.00	0.00	22.30	0.00	0.00	9.10	0.00	4.10	0.00	0.00	0.00	0.00	0.00	0.00	0.00	0.00	4.50	13.00	2.50	0.00	26.70	11.30	10.20	0.00	11.10	12.70
xadapt_152	trained	0.43	3.76	8.99	6.39	0.00	0.00	4.10	39.90	5.30	10.10	0.00	0.00	0.00	0.00	0.00	0.00	47.80	0.00	0.00	0.00	0.00	0.00	0.00	33.70	8.10	0.00	0.00	22.00	0.00	0.00	0.00	0.00	0.00	0.00	0.00	0.00	4.90	0.00	0.00	3.90	8.40	0.00	34.00	0.00	12.30	12.10	0.00	6.90
xadapt_153	trained	0.65	3.75	13.4	9.48	0.00	1.30	28.20	38.00	25.90	32.70	0.00	0.00	0.00	0.00	1.70	0.00	81.20	0.00	0.00	2.40	5.50	0.00	0.00	0.00	8.90	0.00	0.00	7.30	0.00	0.00	0.00	0.00	0.00	0.00	0.00	0.00	2.00	0.00	3.60	2.00	11.50	26.20	30.30	0.00	5.60	0.00	2.10	7.70
xadapt_154	trained	0.79	4.09	15.17	12.24	22.40	0.00	0.60	0.00	41.90	12.40	0.00	0.00	1.70	0.00	0.00	0.00	70.50	0.00	0.00	0.00	4.70	0.00	15.20	0.00	6.00	0.00	0.00	15.50	13.70	0.00	0.00	0.00	0.00	0.00	0.00	0.00	0.00	0.00	2.10	2.50	18.60	0.00	13.20	0.00	10.60	0.00	3.60	7.20
xadapt_155	trained	0.57	4.65	11.72	8.33	0.00	0.00	2.70	12.80	62.10	13.60	0.00	0.00	0.00	0.00	0.00	0.00	26.40	0.00	0.00	0.00	5.40	0.00	0.00	0.00	6.30	0.00	0.00	15.30	0.00	0.00	0.00	0.00	0.00	0.00	0.00	0.00	0.00	98.60	1.80	0.00	1.30	0.00	10.30	0.00	2.50	6.00	0.00	2.40
xadapt_156	trained	0.66	2.95	13.35	9.48	0.00	1.10	2.90	31.30	3.70	14.80	0.00	0.00	0.00	0.00	0.00	0.00	71.70	0.00	0.00	0.00	3.90	0.00	0.00	46.10	5.40	0.00	0.00	6.50	0.00	0.00	0.00	0.00	0.00	0.00	0.00	0.00	0.00	87.10	3.50	1.40	4.90	0.00	20.40	0.00	3.10	0.00	0.00	6.10
xadapt_157	trained	0.44	2.97	9.62	6.83	0.00	0.00	14.00	26.00	23.60	10.20	0.00	0.00	0.00	0.00	0.00	0.00	28.00	0.00	0.00	0.00	4.40	0.00	0.00	0.00	9.40	0.00	0.00	11.90	0.00	0.00	0.00	0.00	18.90	0.00	0.00	0.00	0.00	0.00	0.00	6.80	1.80	9.90	19.40	0.00	5.40	0.00	0.00	4.60
xadapt_158	trained	0.51	3.03	10.2	7.25	15.10	0.00	2.30	0.00	2.30	11.60	5.30	0.00	0.00	0.00	0.00	0.00	55.20	0.00	0.00	2.40	4.40	3.10	0.00	0.00	5.80	0.00	0.00	19.00	0.00	1.40	0.00	0.00	16.40	0.00	0.00	0.00	0.00	90.40	3.00	3.70	3.60	0.00	13.80	0.00	9.10	0.00	1.00	6.30
xadapt_159	trained	0.58	5.46	11.82	8.41	0.00	2.90	2.20	27.70	10.50	29.30	0.00	0.00	0.00	0.00	0.00	0.00	87.50	0.00	0.00	0.00	7.20	0.00	0.00	0.00	7.30	0.00	0.00	9.20	0.00	1.60	0.00	0.00	0.00	0.00	0.00	0.00	0.00	182.90	2.70	9.20	12.60	0.00	4.40	4.50	4.00	9.70	0.00	8.90
xadapt_160	trained	0.48	3.66	9.84	6.99	0.00	0.00	2.50	4.00	9.90	19.40	0.00	0.00	0.00	0.00	0.00	0.00	104.00	0.00	0.00	0.00	5.60	0.00	0.00	0.00	12.60	0.00	0.00	18.60	0.00	1.70	0.00	0.00	0.00	0.00	0.00	0.00	0.00	0.00	3.00	5.40	29.90	0.00	46.50	0.00	5.30	0.00	0.00	2.90
xadapt_161	trained	0.52	3.35	10.73	7.62	57.90	0.00	3.80	0.00	14.50	11.20	0.00	1.40	0.00	5.20	1.90	0.00	116.00	0.00	0.00	0.00	6.90	0.00	0.00	0.00	10.10	0.00	0.00	15.70	0.00	1.80	0.00	0.00	0.00	0.00	0.00	0.00	0.00	0.00	4.50	4.60	46.90	0.00	9.80	6.70	5.30	0.00	0.00	9.90
xadapt_162	trained	0.7	3.47	14.49	12.06	0.00	1.00	1.10	0.00	6.90	12.50	0.00	0.00	0.00	0.00	0.00	0.00	92.40	0.00	0.00	0.00	4.40	0.00	0.00	0.00	9.40	0.00	0.00	7.90	0.00	0.00	0.00	0.00	0.00	0.00	0.00	0.00	0.00	119.20	3.70	3.90	2.90	0.00	6.60	2.70	17.20	0.00	0.00	8.40
xadapt_163	trained	0.76	3.23	15.6	12.44	22.60	0.00	0.00	24.40	2.10	18.40	0.00	0.00	0.00	0.00	0.00	0.00	74.30	0.00	0.00	0.00	3.60	0.00	0.00	0.00	10.70	0.00	0.00	6.80	0.00	0.00	0.00	0.00	17.40	0.00	0.00	0.00	0.00	203.00	1.40	4.30	21.90	0.00	10.10	3.80	14.10	0.00	0.00	7.40
xadapt_164	trained	0.65	3.46	13.27	9.42	0.00	4.80	10.70	31.10	46.80	7.30	27.90	0.00	4.30	0.00	0.00	0.00	154.30	0.00	0.00	3.80	18.00	0.00	0.00	0.00	13.20	0.00	0.00	29.20	0.00	0.00	0.00	0.00	29.70	0.00	0.00	0.00	0.00	0.00	3.80	11.80	4.10	0.00	27.10	3.10	6.70	0.00	4.20	9.20
xadapt_165	trained	0.93	4.3	18.51	17.52	0.00	1.50	10.10	28.10	10.80	6.00	0.00	0.00	3.40	0.00	0.00	0.00	94.50	0.00	0.00	3.20	13.00	0.00	0.00	0.00	15.20	0.00	0.00	30.50	0.00	1.90	0.00	0.00	22.60	0.00	0.00	0.00	0.80	0.00	3.50	15.60	11.60	0.00	8.70	1.90	5.00	6.50	0.00	10.50
xadapt_166	trained	0.78	3.13	16.1	13.9	49.00	3.80	3.70	32.60	35.00	4.70	0.00	0.00	0.00	0.00	0.00	0.00	92.00	0.00	0.00	0.00	0.00	0.00	0.00	0.00	8.00	0.00	0.00	3.70	0.00	0.00	0.00	0.00	0.00	0.00	0.00	0.00	12.40	221.10	0.00	12.20	14.80	0.00	21.40	0.00	23.80	6.30	0.00	12.60
xadapt_167	trained	0.88	3.98	17.98	17	0.00	1.30	1.30	0.00	6.50	12.00	0.00	3.50	3.10	4.80	0.00	0.00	78.00	0.00	0.00	2.50	3.00	0.00	16.70	131.20	7.30	0.00	0.00	11.40	0.00	0.00	0.00	0.00	20.00	0.00	0.00	0.00	0.00	0.00	1.30	1.90	28.70	0.00	4.50	0.00	13.00	0.00	0.00	6.00
xadapt_168	trained	0.65	3.66	13.69	9.73	0.00	1.40	2.10	24.80	3.90	6.20	0.00	0.00	0.90	7.80	0.00	0.00	97.00	0.00	0.00	0.00	5.50	0.00	0.00	0.00	4.40	0.00	0.00	10.00	0.00	1.50	0.00	0.00	15.80	0.00	0.00	0.00	0.00	137.90	2.40	4.40	12.30	0.00	20.30	0.00	3.50	0.00	0.00	6.90
xadapt_169	trained	0.71	3.32	19.18	10.96	0.00	0.00	6.80	33.60	6.00	12.30	8.60	0.00	1.80	5.00	0.00	0.00	87.10	0.00	0.00	0.00	0.00	0.00	0.00	0.00	6.10	0.00	0.00	7.80	0.00	1.80	0.00	0.00	0.00	0.00	0.00	0.00	0.00	0.00	1.60	3.90	12.90	0.00	10.90	2.70	6.40	6.30	0.00	8.60
xadapt_170	trained	0.51	3.51	10.33	7.34	0.00	1.10	19.20	24.50	6.20	7.10	0.00	0.00	0.60	0.00	0.00	0.00	87.90	0.00	0.00	0.00	3.80	0.00	0.00	49.10	5.30	0.00	0.00	3.10	0.00	0.00	0.00	0.00	0.00	0.00	0.00	0.00	0.00	146.60	1.10	2.90	12.80	0.00	8.60	0.00	5.90	7.00	0.00	8.00
xadapt_171	trained	0.63	3.46	12.65	8.97	0.00	0.00	12.50	42.00	36.20	4.20	0.00	0.00	0.00	0.00	0.00	0.00	97.60	0.00	0.00	0.00	0.00	0.00	0.00	57.50	6.80	0.00	0.00	10.00	0.00	0.00	0.00	0.00	0.00	0.00	0.00	0.00	0.00	0.00	0.00	5.00	5.30	0.00	21.70	0.00	13.50	0.00	0.00	4.60
xadapt_172	untrained	0.46	3.54	8.74	6.51	0.00	4.20	2.90	43.40	11.90	18.70	0.00	0.00	0.00	0.00	0.00	0.00	126.50	0.00	0.00	2.60	7.40	0.00	0.00	134.50	16.30	0.00	0.00	13.30	0.00	0.00	0.00	0.00	0.00	0.00	0.00	0.00	3.70	233.60	4.70	4.10	7.90	0.00	17.50	0.00	18.20	12.20	0.00	10.00
xadapt_173	untrained	0.27	3.63	5.46	3.88	0.00	2.40	4.60	20.20	9.80	6.30	0.00	0.00	0.00	0.00	0.00	0.00	57.20	0.00	0.00	3.80	11.40	0.00	0.00	39.70	7.70	0.00	0.00	2.60	0.00	0.00	0.00	0.00	0.00	0.00	0.00	0.00	3.30	0.00	6.80	17.20	8.50	0.00	5.80	0.00	10.40	0.00	0.00	5.30
xadapt_174	untrained	0.52	2.66	10.69	7.61	0.00	4.20	6.80	27.30	4.80	7.10	0.00	0.00	0.00	0.00	0.00	0.00	101.70	0.00	0.00	0.00	14.20	17.40	0.00	0.00	7.60	0.00	0.00	13.20	0.00	1.40	0.00	0.00	0.00	0.00	0.00	0.00	0.00	0.00	3.70	3.40	35.80	0.00	35.90	0.00	13.20	0.00	0.00	5.70
xadapt_175	untrained	0.68	4.39	13.94	9.91	0.00	2.00	9.20	27.30	6.60	13.90	0.00	0.00	0.00	0.00	0.00	0.00	48.20	0.00	0.00	0.00	0.00	0.00	0.00	57.00	20.30	0.00	0.00	19.60	32.50	1.70	0.00	0.00	0.00	0.00	0.00	0.00	3.80	277.50	9.70	7.10	15.80	76.40	20.50	0.00	19.60	0.00	0.00	10.60
xadapt_176	untrained	0.41	3.24	8.3	5.9	0.00	0.00	0.00	0.00	6.00	8.80	0.00	0.00	0.00	0.00	0.00	0.00	76.50	0.00	0.00	0.00	0.00	0.00	0.00	0.00	16.40	0.00	0.00	0.00	0.00	0.00	0.00	0.00	0.00	0.00	0.00	0.00	7.70	0.00	0.00	0.00	38.10	23.10	22.60	0.00	4.40	16.10	0.00	8.50
xadapt_177	untrained	0.52	2.61	10.7	7.63	0.00	3.00	6.20	2.90	11.70	15.00	0.00	0.00	2.90	0.00	0.00	0.00	149.70	0.00	11.70	3.00	11.20	0.00	0.00	72.70	16.10	0.00	0.00	26.00	0.00	0.00	0.00	0.00	0.00	0.00	0.00	0.00	0.00	215.60	5.40	5.30	9.10	0.00	20.10	0.00	14.90	0.00	0.00	8.60
xadapt_178	untrained	0.64	3.19	12.99	9.22	86.60	3.20	4.10	28.30	7.10	9.20	0.00	0.00	1.90	0.00	0.00	0.00	56.60	0.00	0.00	2.00	11.90	0.00	0.00	51.40	17.50	0.00	0.00	20.70	0.00	0.00	0.00	0.00	0.00	0.00	7.50	0.00	0.00	0.00	10.30	6.50	27.30	0.00	28.20	0.00	22.50	0.00	0.00	12.60
xadapt_179	untrained	0.47	2.94	9.61	6.83	51.70	3.00	20.70	0.00	10.90	10.30	0.00	0.00	1.30	0.00	0.00	0.00	58.50	0.00	0.00	2.00	11.10	0.00	0.00	50.70	12.50	0.00	0.00	14.50	0.00	0.00	0.00	0.00	0.00	0.00	0.00	0.00	0.00	120.50	6.20	8.40	28.10	0.00	27.00	8.10	15.80	12.70	4.50	9.80
xadapt_180	untrained	0.5	3.79	10.35	7.35	0.00	2.00	2.50	12.30	17.70	7.00	15.30	0.00	2.40	0.00	0.00	0.00	111.40	0.00	0.00	4.30	20.30	0.00	0.00	64.50	8.70	0.00	0.00	12.50	0.00	0.00	0.00	0.00	0.00	0.00	0.00	0.00	0.00	0.00	3.90	5.10	40.60	0.00	14.10	10.20	6.20	10.00	0.00	6.70
xadapt_181	untrained	0.77	4.14	15.47	12.64	0.00	4.20	7.70	0.00	13.70	12.60	24.30	0.00	0.00	0.00	0.00	0.00	79.10	0.00	0.00	2.20	20.90	0.00	0.00	71.40	16.20	0.00	0.00	24.30	0.00	0.00	0.00	0.00	0.00	0.00	0.00	0.00	0.00	0.00	6.10	10.20	23.80	0.00	15.10	0.00	24.80	14.70	0.00	12.50
xadapt_182	untrained	0.45	3.09	9.35	6.65	0.00	1.50	0.00	17.20	7.50	2.00	0.00	0.00	0.00	0.00	0.00	0.00	60.70	0.00	0.00	0.00	3.60	0.00	0.00	36.90	7.90	0.00	0.00	4.30	17.50	0.00	0.00	0.00	22.90	0.00	0.00	0.00	0.00	0.00	1.70	0.00	3.80	0.00	32.80	0.00	15.70	8.00	0.00	8.00
xadapt_183	untrained	0.66	3.36	13.52	9.62	0.00	0.00	6.30	33.30	12.80	10.90	0.00	0.00	0.00	0.00	0.00	0.00	97.60	0.00	0.00	0.00	6.90	0.00	0.00	0.00	13.40	0.00	0.00	13.00	0.00	2.40	0.00	0.00	0.00	0.00	0.00	0.00	0.00	140.40	8.90	7.50	12.10	0.00	8.70	0.00	4.70	12.10	1.50	3.10
xadapt_184	untrained	0.86	3.24	17.45	16.64	0.00	2.00	2.40	0.00	8.00	6.00	0.00	0.00	2.40	0.00	0.00	0.00	76.90	0.00	0.00	2.50	5.00	15.20	0.00	0.00	6.30	0.00	0.00	7.80	0.00	1.70	0.00	0.00	0.00	0.00	0.00	0.00	0.00	0.00	1.60	7.40	5.70	12.50	28.60	6.20	10.00	0.00	0.00	6.20
xadapt_185	untrained	0.75	3.11	15.46	11.98	0.00	1.70	7.20	13.80	5.70	7.00	0.00	0.00	0.00	0.00	0.00	0.00	68.50	0.00	0.00	0.00	12.30	0.00	0.00	158.90	4.60	0.00	0.00	12.20	0.00	1.40	0.00	0.00	0.00	0.00	0.00	0.00	0.00	0.00	2.80	5.50	19.10	0.00	11.80	0.00	2.90	0.00	0.90	7.20
xadapt_186	untrained	0.48	3.83	9.96	7.08	0.00	5.90	12.60	0.00	7.10	5.10	0.00	0.00	0.00	0.00	0.00	0.00	77.40	0.00	0.00	0.00	11.90	0.00	0.00	0.00	5.90	0.00	0.00	10.40	0.00	1.50	0.00	0.00	0.00	0.00	0.00	0.00	0.00	0.00	0.00	8.00	11.90	0.00	21.20	0.00	3.10	0.00	3.40	6.80
xadapt_187	untrained	0.44	3.58	8.96	6.37	0.00	4.40	5.10	85.00	5.10	8.60	0.00	0.00	0.00	0.00	0.00	0.00	96.40	0.00	0.00	2.20	11.80	0.00	0.00	54.90	5.80	0.00	8.10	4.30	0.00	0.00	0.00	0.00	28.70	0.00	0.00	0.00	0.00	0.00	6.90	5.40	3.70	0.00	15.70	0.00	15.30	0.00	0.00	7.20
xadapt_188	untrained	0.63	3.93	13.07	9.31	40.70	4.80	2.10	14.70	5.50	5.70	0.00	0.00	0.00	0.00	0.00	0.00	109.60	0.00	0.00	2.60	28.30	0.00	0.00	0.00	7.80	0.00	0.00	3.00	0.00	1.70	0.00	0.00	0.00	0.00	0.00	0.00	0.00	0.00	7.60	6.30	45.20	0.00	17.90	0.00	15.50	0.00	0.00	7.80
xadapt_189	untrained	0.8	4.15	16.4	14.24	0.00	0.00	1.20	63.90	5.30	1.10	0.00	0.00	0.00	0.00	0.00	0.00	25.00	0.00	0.00	0.00	0.00	0.00	0.00	29.60	4.10	0.00	0.00	8.10	0.00	0.00	0.00	0.00	18.00	0.00	0.00	0.00	0.00	217.20	0.00	2.80	13.60	0.00	18.20	0.00	9.10	0.00	3.90	6.90
xadapt_190	untrained	0.59	3.55	12.19	8.67	0.00	3.90	6.40	0.00	24.80	4.80	0.00	0.00	0.00	0.00	0.00	0.00	125.30	0.00	0.00	0.00	6.40	0.00	0.00	0.00	8.10	0.00	0.00	17.60	0.00	0.00	0.00	0.00	0.00	0.00	0.00	0.00	0.00	0.00	2.70	4.00	35.10	0.00	22.40	0.00	8.40	0.00	0.00	8.10
xadapt_191	untrained	0.71	3.06	14.33	12.74	0.00	2.00	3.00	0.00	7.70	6.10	0.00	0.00	0.00	0.00	0.00	0.00	44.40	0.00	0.00	0.00	10.20	0.00	0.00	38.60	6.30	0.00	0.00	3.80	0.00	1.20	0.00	0.00	0.00	0.00	0.00	0.00	0.00	0.00	1.60	2.40	16.50	0.00	0.00	0.00	5.30	2.70	0.00	9.20
xadapt_192	untrained	0.74	3.74	15	12.4	0.00	2.70	0.00	0.00	17.30	4.00	0.00	0.00	0.00	0.00	0.00	0.00	63.10	0.00	8.00	0.00	1.70	0.00	0.00	0.00	5.50	0.00	0.00	17.40	0.00	0.00	0.00	0.00	0.00	0.00	0.00	0.00	0.00	0.00	0.00	2.00	3.90	0.00	22.60	5.50	4.70	0.00	3.80	6.20
xadapt_193	untrained	0.42	3.72	8.73	6.2	0.00	3.20	2.30	20.00	0.60	0.00	0.00	0.00	0.00	0.00	0.00	0.00	39.40	0.00	0.00	0.00	0.00	0.00	12.10	28.90	2.40	0.00	0.00	4.40	0.00	0.00	0.00	0.00	0.00	0.00	0.00	0.00	0.00	0.00	0.00	0.00	5.80	0.00	4.90	0.00	5.60	0.00	0.00	3.80
xadapt_194	untrained	0.6	2.72	12.4	8.83	0.00	3.60	9.60	48.40	7.10	2.40	0.00	0.00	4.50	0.00	6.20	0.00	118.30	0.00	0.00	3.50	14.40	0.00	0.00	0.00	5.90	0.00	0.00	13.80	0.00	1.20	0.00	0.00	0.00	0.00	0.00	0.00	0.00	0.00	4.80	2.80	9.50	0.00	19.30	4.50	7.00	10.50	0.00	7.50
xadapt_195	untrained	0.4	3.32	8.26	5.87	36.50	1.30	0.00	0.00	6.40	4.20	0.00	0.00	0.00	0.00	0.00	0.00	42.60	0.00	0.00	0.00	0.00	0.00	0.00	0.00	4.70	0.00	0.00	14.90	0.00	1.60	0.00	0.00	0.00	0.00	0.00	0.00	0.00	0.00	0.00	2.30	14.60	0.00	0.00	4.10	8.30	0.00	0.00	3.90
xadapt_196	untrained	0.39	4.34	8.22	5.84	0.00	2.20	1.70	24.60	5.70	17.60	0.00	0.00	0.00	0.00	0.00	0.00	30.50	0.00	7.60	0.00	0.00	0.00	0.00	0.00	11.80	0.00	0.00	3.30	15.80	0.00	0.00	0.00	0.00	0.00	0.00	0.00	0.00	106.20	0.00	3.10	16.70	0.00	12.60	3.60	14.70	8.60	0.00	8.50
xadapt_198	untrained	0.71	2.99	14.43	11.78	0.00	2.80	6.50	0.00	9.90	22.80	0.00	0.00	0.00	0.00	0.00	0.00	126.10	0.00	0.00	2.50	10.20	0.00	0.00	0.00	11.30	4.90	0.00	14.70	40.50	3.50	0.00	0.00	0.00	0.00	0.00	0.00	0.00	0.00	7.70	2.60	34.50	0.00	23.00	11.50	57.80	14.00	0.00	20.30
xadapt_199	untrained	0.67	2.01	14.04	9.98	0.00	2.90	2.20	0.00	4.00	8.80	0.00	0.00	2.30	0.00	0.00	0.00	41.70	0.00	0.00	0.00	25.30	0.00	0.00	44.10	9.20	0.00	0.00	3.60	0.00	3.00	0.00	0.00	0.00	0.00	0.00	0.00	1.80	246.40	1.80	0.00	23.30	0.00	11.00	8.50	19.10	0.00	0.00	17.90
xadapt_200	untrained	0.57	1.82	11.96	8.5	0.00	1.70	7.30	32.70	7.60	13.60	0.00	0.00	0.00	0.00	0.00	0.00	83.00	0.00	0.00	0.00	6.40	0.00	0.00	0.00	8.50	0.00	0.00	5.80	0.00	0.00	0.00	0.00	0.00	0.00	0.00	0.00	0.00	0.00	1.50	7.20	8.00	0.00	7.80	0.00	18.90	0.00	5.80	8.60
xadapt_201	untrained	0.47	3.01	9.57	6.83	0.00	0.00	5.80	20.80	5.70	4.90	0.00	0.00	0.00	0.00	0.00	0.00	93.60	0.00	0.00	0.00	16.20	0.00	0.00	56.10	10.10	0.00	0.00	18.90	0.00	0.00	0.00	0.00	0.00	0.00	0.00	0.00	0.00	0.00	6.10	10.30	32.30	0.00	14.40	0.00	16.20	0.00	3.70	10.90
xadapt_202	untrained	0.93	2.05	18.88	17.22	0.00	0.00	24.80	121.00	36.20	10.40	9.30	0.00	1.30	0.00	0.00	0.00	60.60	0.00	0.00	0.00	11.00	0.00	0.00	0.00	12.10	0.00	0.00	8.50	0.00	3.70	0.00	0.00	33.00	0.00	0.00	0.00	2.70	197.20	4.40	5.50	35.80	0.00	16.60	8.10	34.90	0.00	0.00	14.30
xadapt_204	untrained	0.48	3.17	9.76	6.94	47.50	1.60	8.20	0.00	24.30	4.60	0.00	0.00	2.30	0.00	0.00	0.00	46.90	0.00	0.00	1.50	9.80	0.00	0.00	46.60	8.70	0.00	0.00	4.00	0.00	0.00	0.00	0.00	0.00	0.00	0.00	0.00	0.00	203.30	7.90	9.90	13.40	0.00	16.70	4.60	7.90	0.00	0.00	8.90
xadapt_205	untrained	0.65	3.49	13.15	9.34	90.60	3.30	8.30	34.20	23.40	5.50	0.00	0.00	0.00	0.00	0.00	0.00	138.40	0.00	0.00	4.40	18.90	0.00	0.00	0.00	14.90	0.00	0.00	10.70	0.00	2.20	0.00	0.00	0.00	0.00	0.00	0.00	0.00	0.00	4.40	9.70	95.10	0.00	18.80	0.00	37.70	0.00	0.00	8.40
xadapt_206	untrained	0.65	4.29	13.18	9.36	0.00	0.00	4.90	0.00	31.70	4.30	0.00	0.00	0.00	0.00	0.00	0.00	75.10	0.00	0.00	0.00	0.00	9.90	0.00	0.00	10.90	0.00	0.00	3.30	0.00	2.20	0.00	0.00	24.70	0.00	0.00	0.00	0.00	122.50	0.00	1.40	13.70	0.00	24.10	3.70	13.80	8.20	0.00	11.20
xadapt_207	trained	0.23	3.47	4.64	3.29	0.00	0.80	9.90	0.00	6.30	4.40	0.00	0.00	0.00	0.00	0.00	0.00	17.30	0.00	0.00	0.00	0.00	0.00	0.00	0.00	2.30	0.00	0.00	3.60	0.00	0.00	0.00	0.00	0.00	0.00	0.00	0.00	0.00	0.00	0.00	0.00	18.70	0.00	0.00	0.00	2.60	0.00	0.00	1.80
xadapt_208	trained	0.52	3.74	10.55	7.51	37.70	6.10	38.30	26.90	4.20	6.80	0.00	0.00	0.00	0.00	0.00	0.00	97.60	0.00	0.00	0.00	0.00	21.10	0.00	0.00	7.40	0.00	0.00	5.10	17.40	0.00	0.00	0.00	0.00	0.00	0.00	0.00	4.30	0.00	0.00	4.20	13.50	0.00	32.10	0.00	3.10	0.00	0.00	4.70
xadapt_210	trained	0.47	3.2	9.79	6.91	0.00	1.50	15.50	35.00	16.90	9.10	0.00	0.00	0.00	0.00	0.00	0.00	51.20	0.00	0.00	0.00	2.40	0.00	0.00	43.90	6.80	0.00	0.00	3.60	14.70	0.00	0.00	0.00	0.00	0.00	0.00	0.00	0.00	142.50	3.20	2.40	24.90	0.00	14.00	0.00	1.90	0.00	0.00	6.20
xadapt_211	trained	0.46	3.29	9.54	6.76	0.00	1.10	2.90	28.90	53.70	4.50	0.00	11.90	0.00	0.00	0.00	0.00	59.00	0.00	0.00	0.00	2.30	0.00	0.00	0.00	4.70	0.00	0.00	7.50	0.00	0.00	0.00	0.00	0.00	0.00	2.00	0.00	0.00	0.00	3.00	3.60	20.10	0.00	10.30	3.00	6.20	0.00	0.00	5.50
xadapt_212	trained	0.49	2.75	10.05	7.15	40.30	2.20	1.70	0.00	6.10	3.70	0.00	0.00	0.70	0.00	0.00	0.00	30.70	0.00	0.00	0.00	1.50	0.00	0.00	31.50	4.60	0.00	0.00	4.20	0.00	0.00	0.00	0.00	0.00	0.00	0.00	0.00	0.00	0.00	1.80	3.90	18.50	0.00	15.60	0.00	3.10	0.00	0.00	1.20
xadapt_213	trained	0.24	4.65	5.01	3.57	0.00	1.10	0.40	4.50	2.80	2.90	0.00	0.00	0.00	0.00	0.00	0.00	21.10	0.00	0.00	0.00	5.10	0.00	0.00	0.00	2.50	0.00	0.70	6.00	0.00	0.50	0.00	0.00	0.00	0.00	0.00	0.00	0.00	97.90	0.90	1.40	7.70	0.00	3.80	0.00	3.00	0.00	0.00	2.00
xadapt_214	trained	0.28	2.53	5.95	4.23	0.00	1.30	0.00	0.00	10.10	6.90	0.00	0.00	0.00	0.00	0.00	0.00	27.30	0.00	0.00	0.00	2.10	0.00	0.00	40.30	3.40	0.00	1.10	2.90	0.00	0.00	0.00	0.00	0.00	0.00	0.00	0.00	2.30	0.00	0.00	2.00	9.50	0.00	7.90	2.00	4.00	0.00	0.00	3.30
xadapt_215	trained	0.37	5.29	7.54	5.37	32.40	2.90	2.10	0.00	15.50	3.50	0.00	0.00	0.00	0.00	0.00	0.00	68.30	0.00	0.00	0.00	0.00	0.00	0.00	0.00	5.30	0.00	0.00	3.40	0.00	0.00	0.00	0.00	0.00	0.00	0.00	0.00	2.80	0.00	0.00	1.20	6.90	0.00	14.60	0.00	2.50	0.00	0.00	3.00
xadapt_216	trained	0.87	2.95	17.8	16.22	0.00	0.00	11.00	0.00	22.80	7.10	0.00	0.00	0.00	0.00	0.00	0.00	33.60	0.00	0.00	0.00	12.50	13.50	0.00	52.20	7.90	0.00	0.00	13.80	0.00	0.70	0.00	0.00	0.00	0.00	0.00	0.00	1.30	0.00	5.40	3.60	15.30	0.00	31.70	0.00	19.80	0.00	0.00	9.90
xadapt_217	trained	0.47	2.75	9.92	7.05	0.00	0.00	2.60	0.00	10.50	4.20	0.00	0.00	0.00	0.00	0.00	0.00	34.20	0.00	0.00	0.00	0.00	0.00	0.00	32.20	2.10	0.00	0.00	4.20	0.00	0.70	0.00	0.00	0.00	0.00	0.00	0.00	0.80	0.00	0.00	0.00	13.40	0.00	13.30	1.80	4.80	0.00	0.00	3.40
xadapt_218	trained	0.62	3.62	12.91	9.17	0.00	1.90	3.80	28.10	16.10	2.40	0.00	0.00	0.00	0.00	0.00	0.00	69.70	0.00	0.00	0.00	6.40	0.00	0.00	50.00	4.60	0.00	0.00	18.50	0.00	0.00	0.00	0.00	0.00	0.00	0.00	0.00	0.00	181.70	3.90	0.00	13.20	0.00	24.40	0.00	2.60	0.00	0.00	5.50
xadapt_219	trained	0.34	6.09	7.19	5.1	0.00	1.90	0.00	0.00	2.10	0.00	0.00	0.00	0.00	0.00	0.00	0.00	55.70	0.00	0.00	0.00	0.00	0.00	0.00	0.00	3.90	0.00	0.00	2.00	10.30	0.00	0.00	0.00	0.00	0.00	0.00	0.00	4.20	0.00	3.60	0.00	0.00	0.00	10.20	10.40	3.80	0.00	0.00	4.00
xadapt_220	trained	0.39	3.96	7.8	5.54	0.00	2.10	6.30	0.00	9.20	4.10	0.00	0.00	0.00	0.00	0.00	0.00	33.30	0.00	0.00	0.00	10.10	4.20	0.00	43.00	5.60	0.00	0.00	13.10	14.50	0.00	0.00	0.00	0.00	0.00	0.00	0.00	14.70	71.10	0.00	7.30	16.10	0.00	10.40	16.40	6.70	0.00	0.00	5.80
xadapt_222	trained	0.57	5.52	11.47	8.16	0.00	0.00	1.10	0.00	0.00	0.00	0.00	0.00	0.00	0.00	0.00	0.00	14.80	0.00	2.50	0.00	0.00	0.00	0.00	49.00	2.40	0.00	0.00	0.00	0.00	0.00	0.00	0.00	0.00	0.00	2.00	0.00	0.00	0.00	0.00	0.00	2.40	0.00	11.90	0.00	2.30	0.00	0.00	5.90
xadapt_223	trained	0.52	5.4	10.69	7.58	0.00	2.00	7.40	0.00	6.30	0.00	0.00	0.00	0.00	0.00	0.00	0.00	109.40	0.00	4.60	0.00	8.20	0.00	0.00	66.60	8.00	0.00	0.00	15.40	0.00	2.50	0.00	0.00	0.00	0.00	0.00	0.00	0.00	0.00	7.20	7.10	0.00	0.00	8.00	20.70	8.00	0.00	0.00	7.00
xadapt_224	trained	0.43	3.34	8.89	6.32	0.00	0.00	5.00	28.30	6.60	0.00	0.00	0.00	0.00	0.00	0.00	0.00	58.50	0.00	0.00	0.00	0.00	0.00	0.00	104.80	5.10	3.30	0.00	7.60	0.00	2.60	0.00	0.00	0.00	0.00	0.00	0.00	0.00	0.00	6.40	6.70	17.30	0.00	18.00	14.10	4.20	0.00	0.00	7.70
xadapt_225	trained	0.43	4.22	8.91	6.33	27.70	2.10	2.80	9.50	2.40	3.60	0.00	0.00	0.00	0.00	0.00	0.00	47.80	0.00	0.00	0.00	0.00	0.00	0.00	0.00	5.50	2.70	0.00	9.90	0.00	2.20	0.00	0.00	0.00	0.00	0.00	0.00	0.00	99.40	0.00	0.00	4.40	0.00	29.50	0.00	4.00	0.00	0.00	7.30
xadapt_226	trained	0.81	3.44	16.51	13.38	0.00	2.10	8.50	32.40	6.50	10.20	0.00	0.00	2.80	0.00	0.00	0.00	85.00	0.00	0.00	0.00	12.80	0.00	0.00	0.00	6.40	0.00	0.00	14.80	0.00	0.00	0.00	0.00	0.00	0.00	0.00	0.00	0.00	0.00	0.00	13.20	8.20	0.00	6.40	12.50	0.00	0.00	0.00	9.90
xadapt_228	trained	0.59	3.51	12.14	8.63	0.00	0.00	5.60	21.60	4.90	6.70	0.00	0.00	0.00	0.00	0.00	0.00	74.10	0.00	0.00	0.00	0.00	0.00	0.00	0.00	5.00	5.40	0.00	8.30	0.00	0.00	0.00	0.00	0.00	0.00	5.30	0.00	0.00	0.00	0.00	0.00	15.30	0.00	13.90	0.00	4.00	0.00	0.00	7.30
xadapt_229	trained	0.77	3.78	15.49	13.62	0.00	2.40	0.00	16.60	7.60	5.00	0.00	0.00	0.00	0.00	0.00	0.00	139.70	0.00	0.00	0.00	24.80	0.00	0.00	0.00	5.40	8.00	4.00	18.70	19.60	0.00	0.00	0.00	0.00	0.00	0.00	0.00	4.00	328.00	6.60	0.00	46.90	0.00	18.60	0.00	8.00	10.10	0.00	9.50
xadapt_230	trained					0.00	0.00	4.80	0.00	5.10	0.00	0.00	0.00	0.00	0.00	0.00	0.00	88.70	0.00	0.00	0.00	0.00	0.00	0.00	0.00	4.30	0.00	0.00	5.20	0.00	0.00	0.00	12.00	21.70	0.00	0.00	0.00	0.00	0.00	0.00	0.00	0.00	0.00	0.00	0.00	18.10	0.00	0.00	8.00
xadapt_231	trained	0.37	5.22	7.46	5.27	0.00	1.40	5.00	0.00	42.50	0.00	0.00	0.00	0.00	0.00	0.00	0.00	0.00	0.00	0.00	0.00	0.00	4.70	0.00	0.00	3.10	0.00	0.00	11.30	0.00	6.70	0.00	3.90	0.00	5.30	0.00	0.00	0.00	0.00	0.00	6.90	0.00	0.00	0.00	0.00	2.70	0.00	0.00	6.10
xadapt_232	trained	0.43	3.81	8.74	6.21	0.00	2.70	0.00	0.00	2.30	2.40	0.00	0.00	0.00	0.00	0.00	0.00	24.60	0.00	0.00	0.00	0.00	14.20	0.00	0.00	4.20	0.00	0.00	9.10	0.00	0.00	0.00	0.00	0.00	0.00	0.00	0.00	0.00	176.80	0.00	0.00	23.30	0.00	15.60	9.40	7.00	0.00	0.00	7.20
xadapt_233	trained	0.29	3.76	6.18	4.41	37.20	1.20	5.10	0.00	4.90	0.00	0.00	0.00	0.00	0.00	0.00	0.00	20.60	6.40	0.00	0.00	0.00	0.00	0.00	0.00	3.60	2.40	0.00	6.50	0.00	0.00	0.00	0.00	15.80	0.00	0.00	0.00	0.00	80.00	3.00	5.60	21.90	0.00	13.90	11.80	5.40	4.90	0.00	5.90
xadapt_234	trained	0.41	3.04	8.41	5.98	44.00	0.00	6.50	0.00	22.60	12.80	0.00	0.00	0.00	0.00	0.00	0.00	61.90	0.00	0.00	0.00	5.10	0.00	0.00	47.90	6.40	4.20	0.00	4.70	0.00	1.70	0.00	0.00	0.00	0.00	0.00	0.00	0.00	221.10	9.70	3.10	45.80	0.00	20.50	7.00	2.00	0.00	0.00	7.90
xadapt_235	trained	0.38	3.47	7.99	5.69	32.20	2.10	8.90	22.60	13.40	13.70	0.00	0.00	0.00	0.00	0.00	0.00	37.80	0.00	0.00	0.00	5.80	0.00	0.00	0.00	5.20	0.00	2.00	12.60	15.40	1.70	0.00	0.00	19.10	0.00	0.00	0.00	0.00	47.80	5.20	5.10	18.10	0.00	13.50	9.20	5.60	0.00	0.00	8.40
xadapt_236	trained	0.39	3.77	8.33	5.77	20.60	1.00	8.80	0.00	3.60	3.50	0.00	0.00	0.00	0.00	0.00	0.00	33.50	0.00	0.00	0.00	0.00	0.00	0.00	27.60	4.60	0.00	3.30	5.90	0.00	0.00	0.00	0.00	0.00	0.00	3.20	0.00	0.00	0.00	1.80	0.00	36.00	0.00	7.90	4.50	2.40	0.00	1.80	5.40
xadapt_237	trained	0.35	4.56	7.2	5.11	0.00	1.50	5.10	19.70	18.60	6.80	0.00	0.00	0.00	0.00	0.00	0.00	71.20	0.00	0.00	0.00	3.70	0.00	0.00	41.00	4.80	0.00	0.00	4.70	0.00	1.10	0.00	0.00	0.00	0.00	0.00	0.00	0.00	0.00	0.00	1.70	51.70	0.00	17.80	7.40	6.10	0.00	0.00	6.00
xadapt_238	trained	0.22	2.94	4.45	3.17	0.00	1.10	1.10	0.00	1.40	0.00	0.00	0.00	0.00	0.00	0.00	0.00	39.90	0.00	0.00	0.00	0.00	9.70	0.00	0.00	2.70	0.00	0.00	0.00	0.00	0.00	0.00	0.00	0.00	0.00	0.00	0.00	0.00	83.30	0.00	0.00	19.30	0.00	0.00	3.90	2.80	4.90	0.00	3.30
xadapt_239	trained	0.31	3.97	6.79	4.84	0.00	0.00	1.20	0.00	3.50	0.00	0.00	0.00	0.00	0.00	0.00	0.00	19.80	0.00	0.00	0.00	0.00	0.00	7.80	23.00	3.00	0.00	0.00	4.20	0.00	0.00	0.00	0.00	0.00	0.00	0.00	0.00	0.00	0.00	0.00	0.00	10.30	0.00	5.70	0.00	3.70	0.00	0.00	2.40
[truncated: 292 more columns]
